# Supplementary material for: Synthesis and characterization of steroidal heterocyclic compounds, DNA condensation and molecular docking studies and their in vitro anticancer and acetylcholinesterase inhibition activities
Source: Royal Society of Chemistry journal article supplement (doi:10.1039/c5ra11049a), 2015-01-01
Supplement: c5ra11049a1.pdf [file c5ra11049a1.pdf]

## SUPPORTING INFORMATION

### FOR

**Synthesis, characterization of steroidal heterocyclic compounds, DNA condensation and molecular docking studies and their *in vitro* anticancer and acetylcholinesterase inhibition activities**

**Abad Ali<sup>a</sup>, Mohd Asif<sup>a</sup>, Hena Khanam<sup>a</sup>, Ashraf Mashrai<sup>a</sup>, Mohd. Asif Sherwani<sup>b</sup>,  
Mohammad Owais<sup>b</sup>, Shamsuzzaman<sup>a\*</sup>**

<sup>a</sup>*Steroid Research Laboratory, Department of Chemistry, Aligarh Muslim University, Aligarh 202 002, India*

<sup>b</sup>*Interdisciplinary Biotechnology Unit, Aligarh Muslim University, Aligarh 202 002, India*

*\*Corresponding author, E-mail address: shamsuzzaman9@gmail.com; phone no +919411003465*

## Figures of $^1\text{H}$ NMR and $^{13}\text{C}$ NMR Spectra

Please note that some peaks in  $^{13}\text{C}$ NMR spectra are merged due to complex steroidal skeleton. That's why chemical shift values of only those peaks are given in experimental section, which are clear in the spectra.

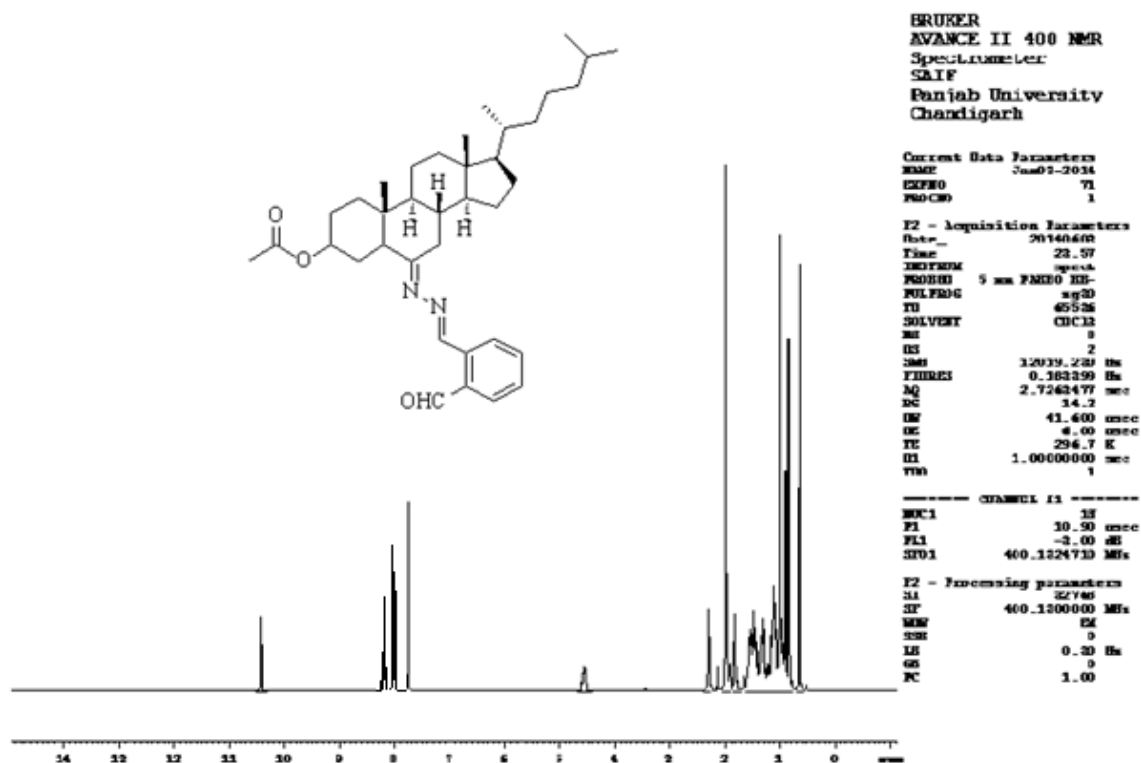

**Fig S1.**  $^1\text{H}$ NMR of  $3\beta$ -Acetoxy- $5\alpha$ -cholestan-6-(iminohydrazono)-2-methylbenzaldehyde (**1e**)

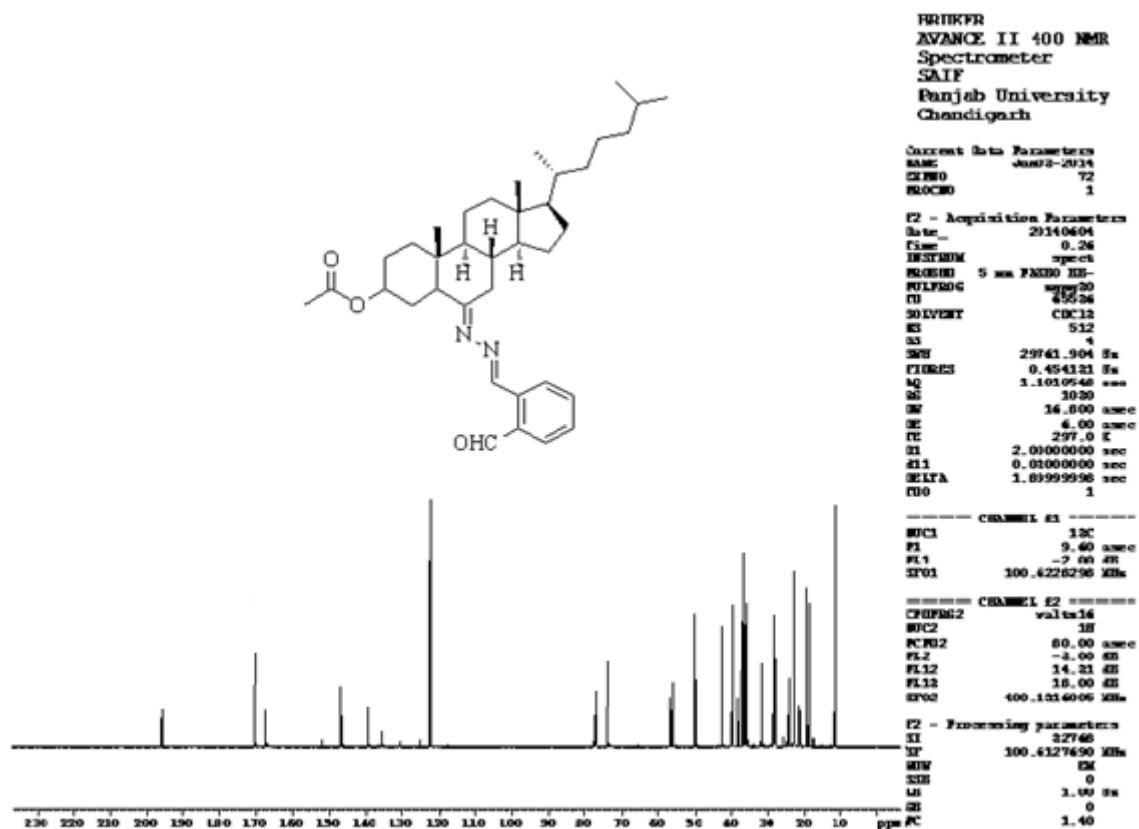

**Fig S2.**  $^{13}\text{C}$ NMR of 3 $\beta$ -Acetoxy-5 $\alpha$ -cholestan-6-(iminohydrazono)-2-methylbenzaldehyde (**1e**)

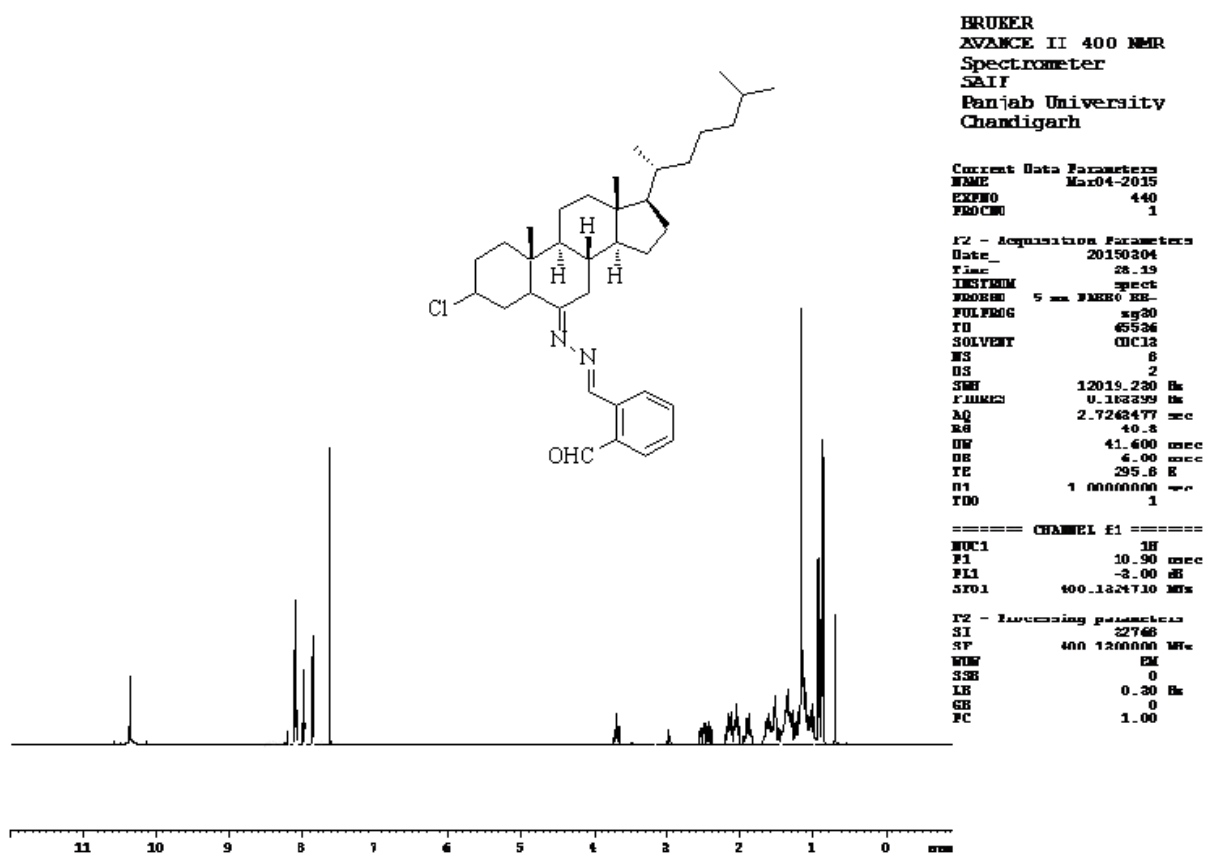

**Fig S3.**  $^1\text{H}$ NMR of 3 $\beta$ -Chloro-5 $\alpha$ -cholestan-6-(iminohydrazono)-2-methylbenzaldehyde (**2e**)

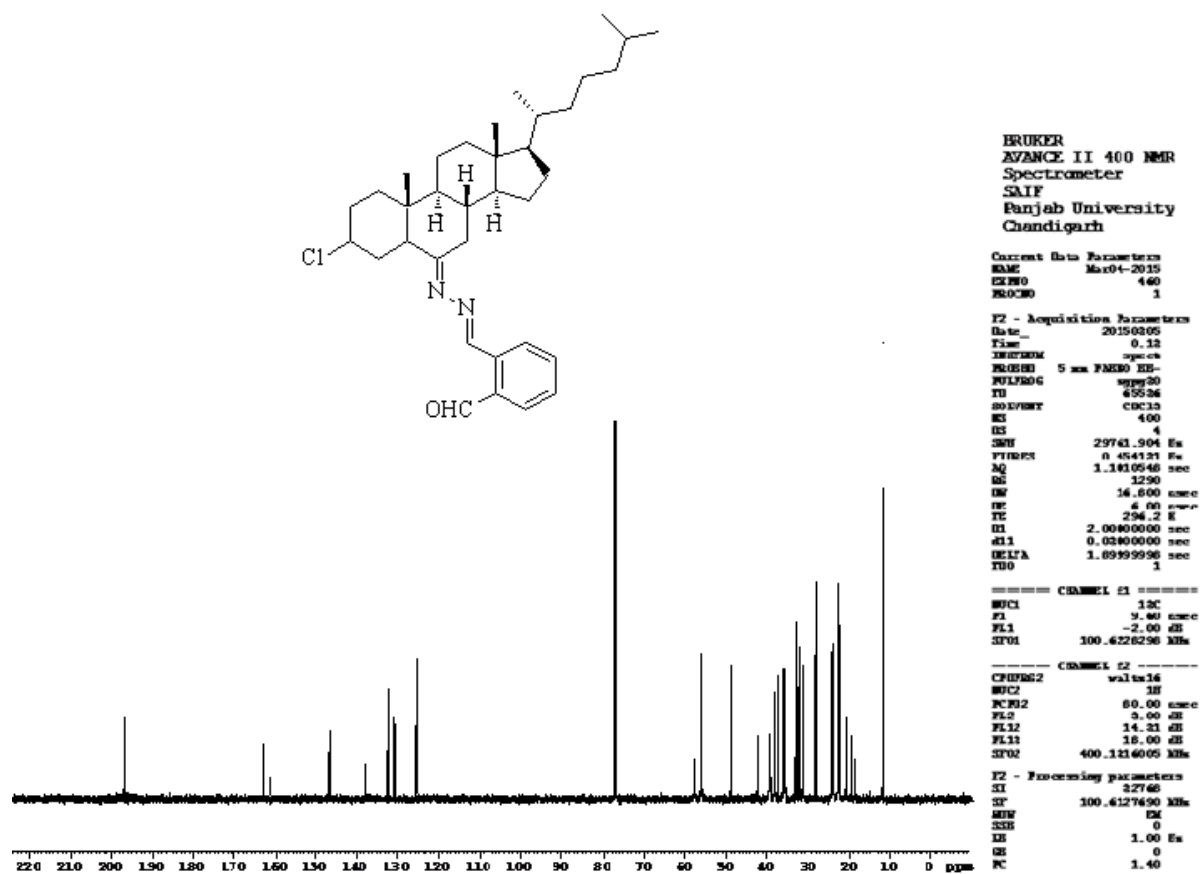

Fig S4.  $^{13}\text{C}$ NMR of 3 $\beta$ -Chloro-5 $\alpha$ -cholestan-6-(iminohydrazono)-2-methylbenzaldehyde (2e)

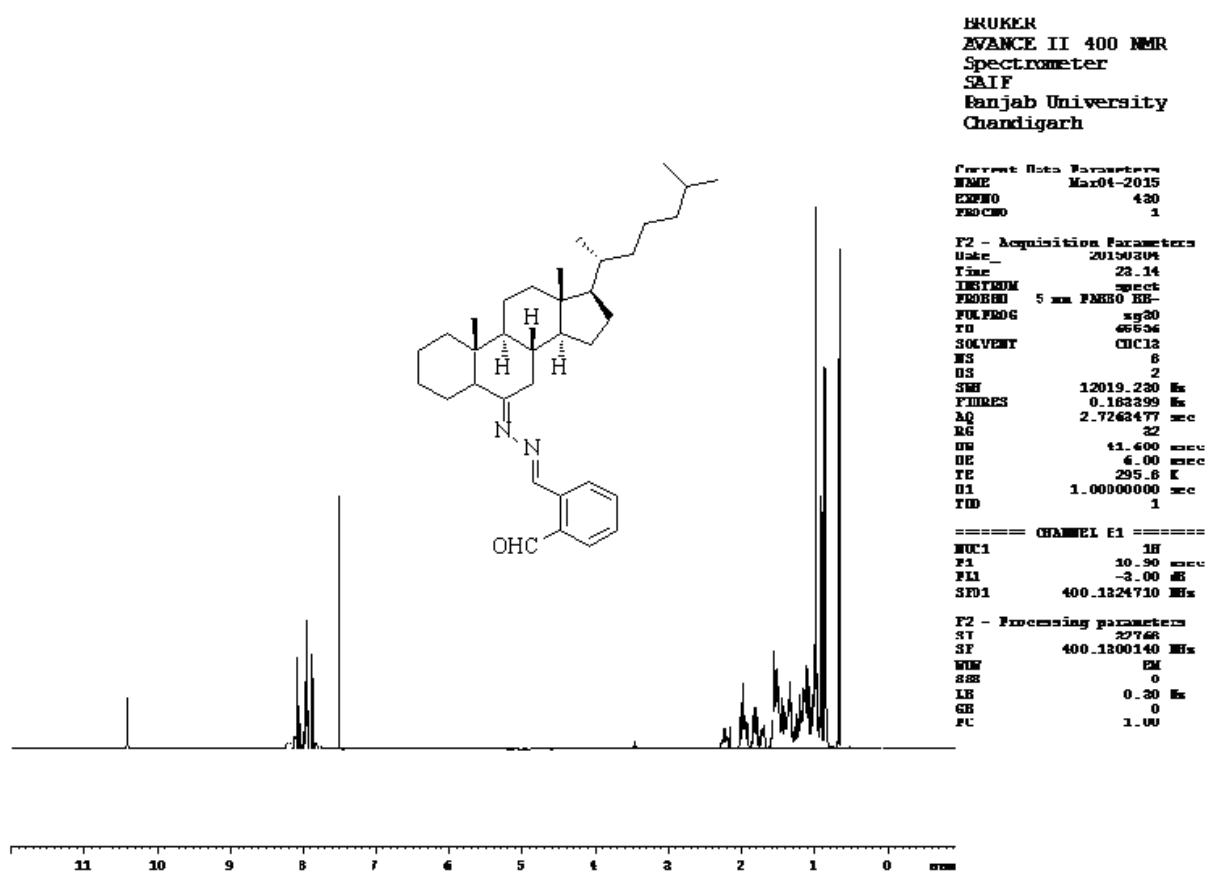

**Fig S5.**  $^1\text{H}$ NMR of *5 $\alpha$ -cholestan-6-(iminohydrazono)-2-methylbenzaldehyde (3e)*

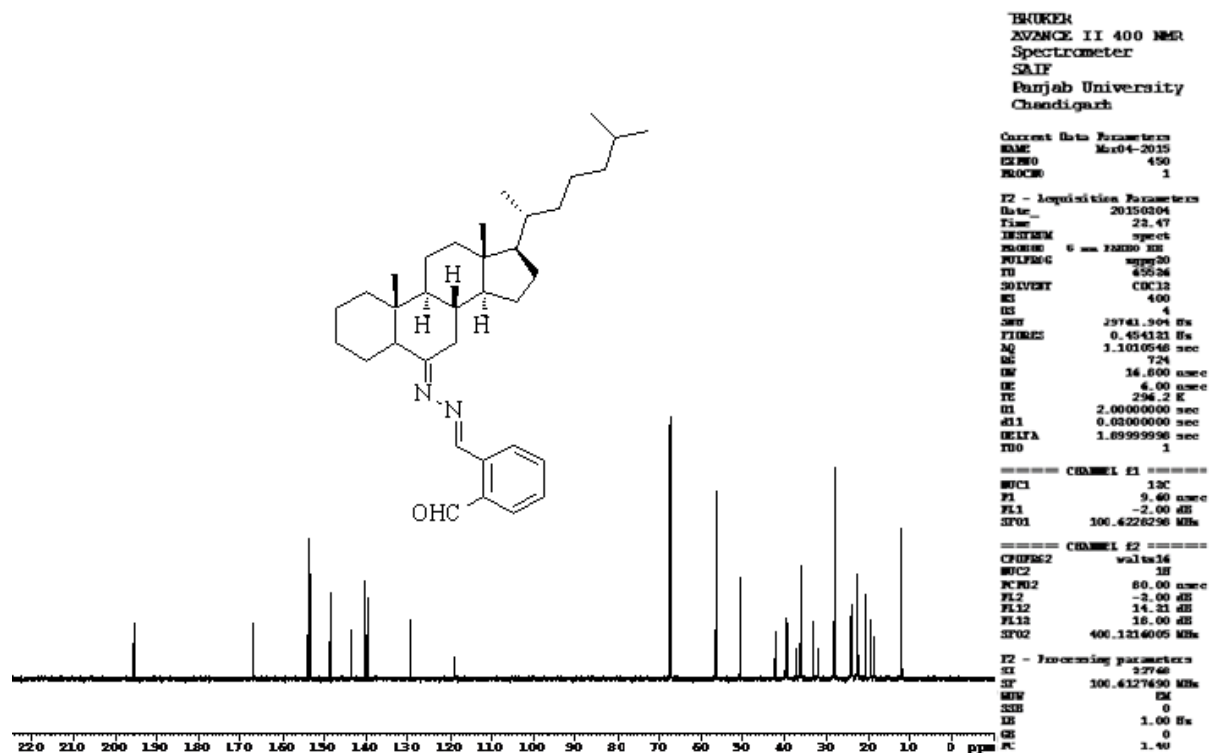

Fig S6.  $^{13}\text{C}$ NMR of  $5\alpha$ -cholestan-6-(iminohydrazono)-2-methylbenzaldehyde (**3e**)

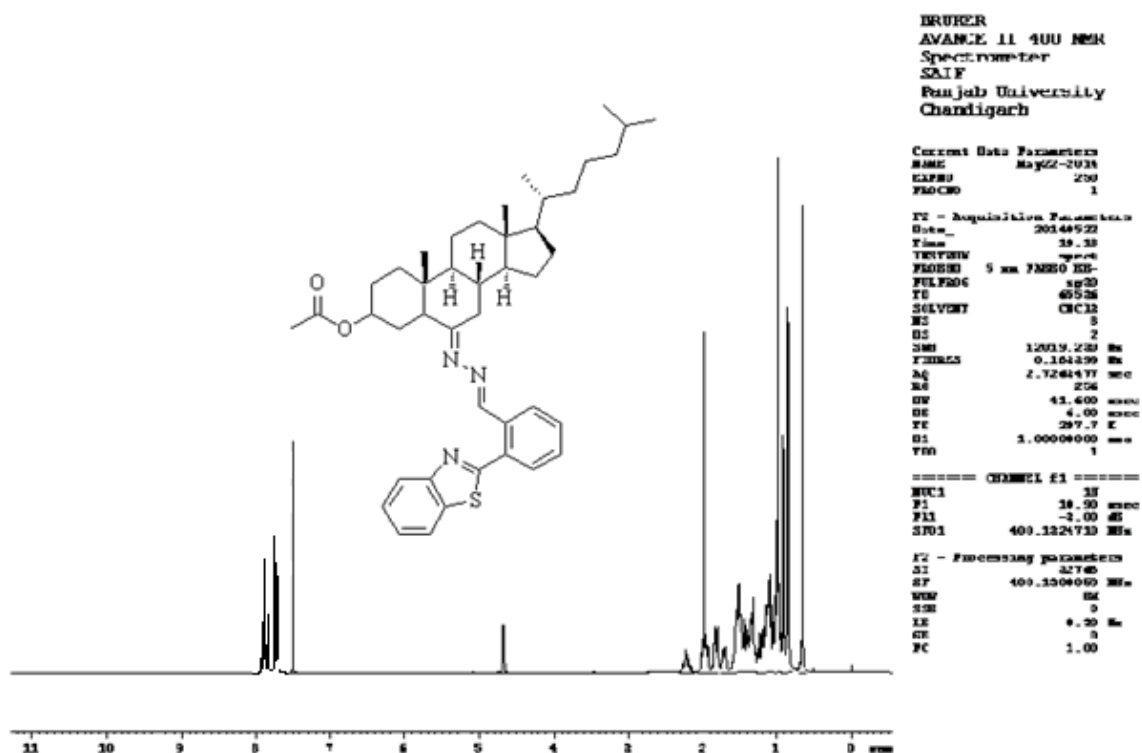

**Fig S7.**  $^1\text{H}$ NMR of  $3\beta$ -Acetoxy- $5\alpha$ -cholestan-6-(iminohydrazonomethylphenyl-2-yl)-benzo- $[d]$ -thiazole (**4**)



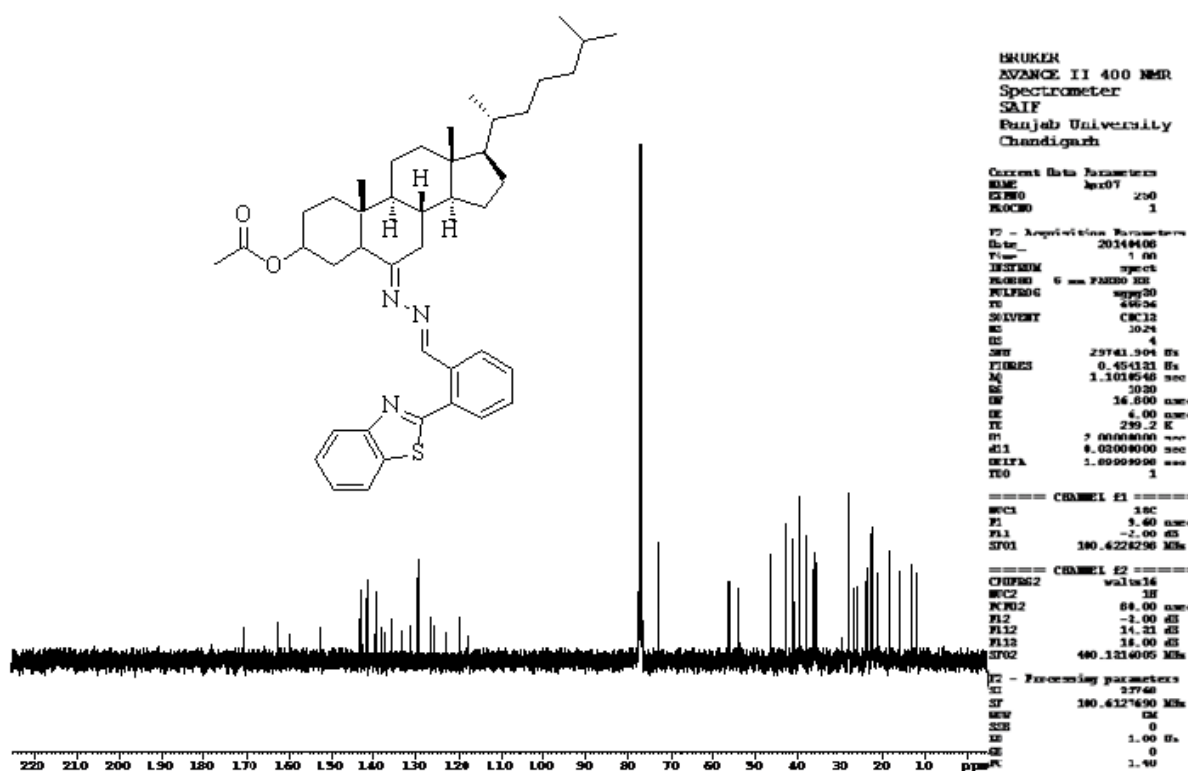

**Fig S8.**  $^{13}\text{C}$ NMR of  $3\beta$ -Acetoxy- $5\alpha$ -cholestan-6-(iminohydrazonomethylphenyl-2-yl)-benzo- $[d]$ -thiazole (**4**)

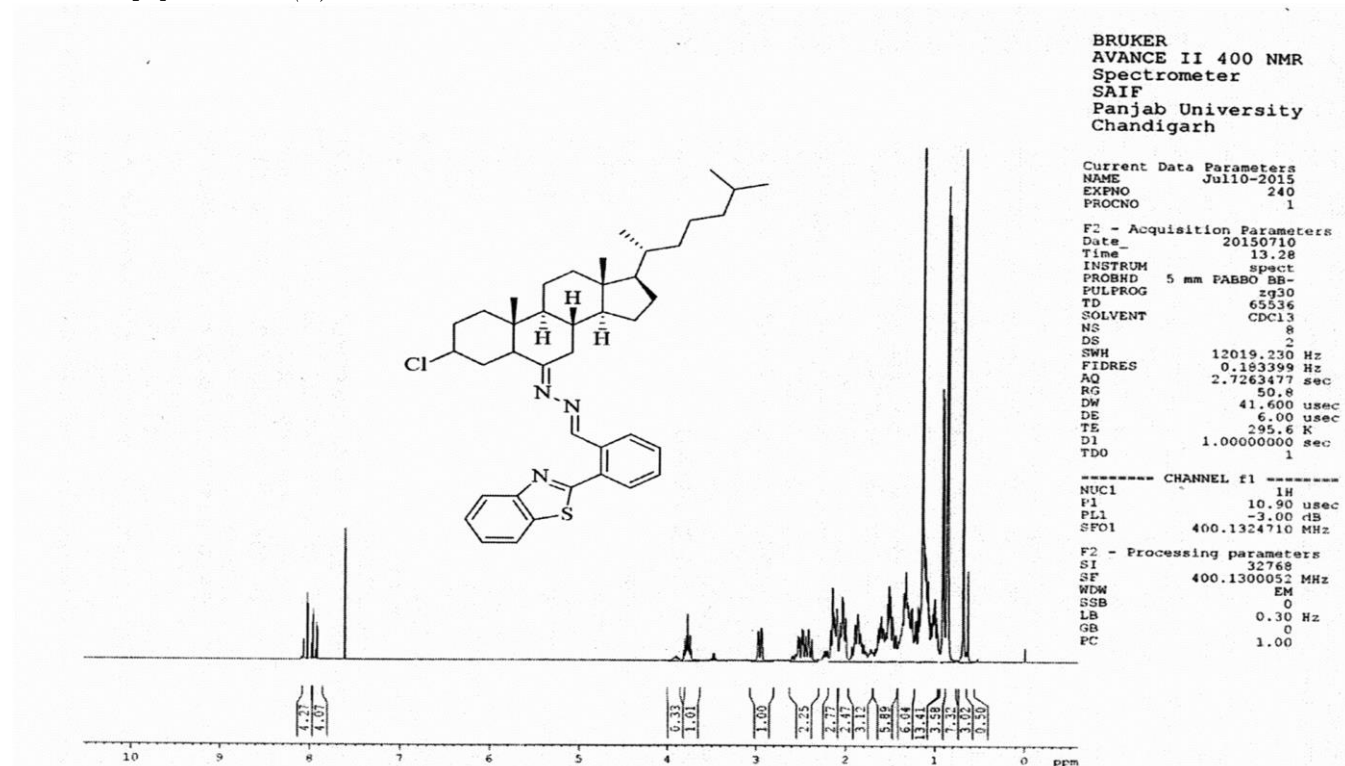

**Fig S9.**  $^1\text{H}$ NMR of  $3\beta$ -Chloro- $5\alpha$ -cholestan-6-(iminohydrazonomethylphenyl-2-yl)-benzo- $[d]$ -thiazole (**5**)

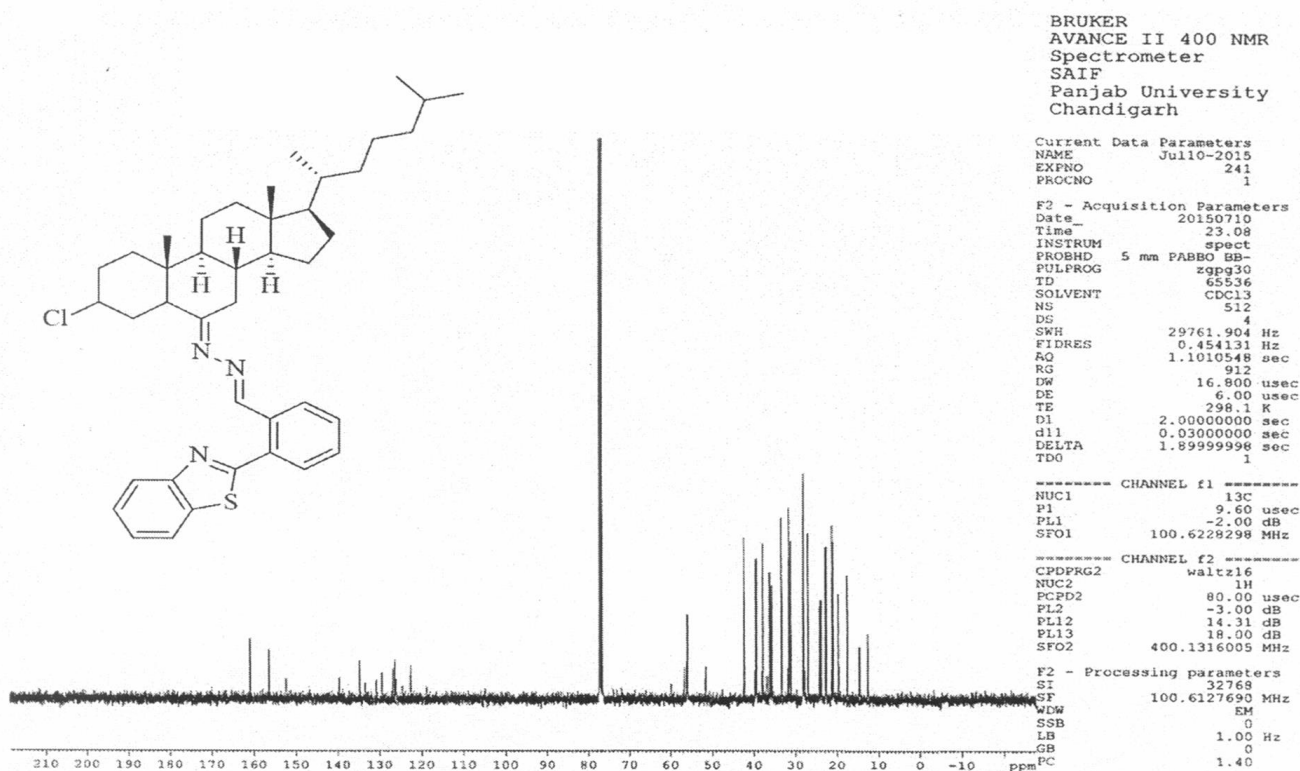

**Fig S10.** <sup>13</sup>CNMR of 3 $\beta$ -Chloro-5 $\alpha$ -cholestan-6-(iminohydrazonomethylphenyl-2-yl)-benzo-[d]-thiazole (5)

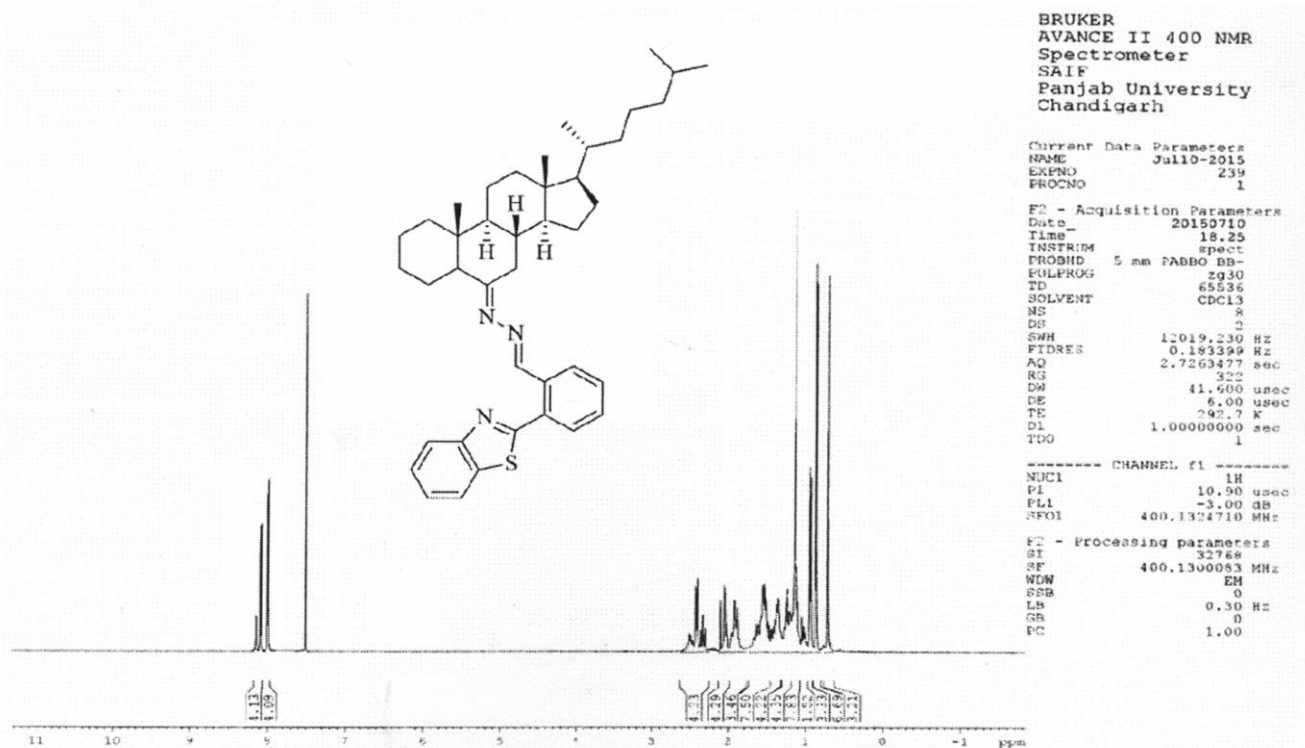

**Fig S11.** <sup>1</sup>HNMR of 5 $\alpha$ -cholestan-6-(iminohydrazonomethylphenyl-2-yl)-benzo-[d]-thiazole (6)

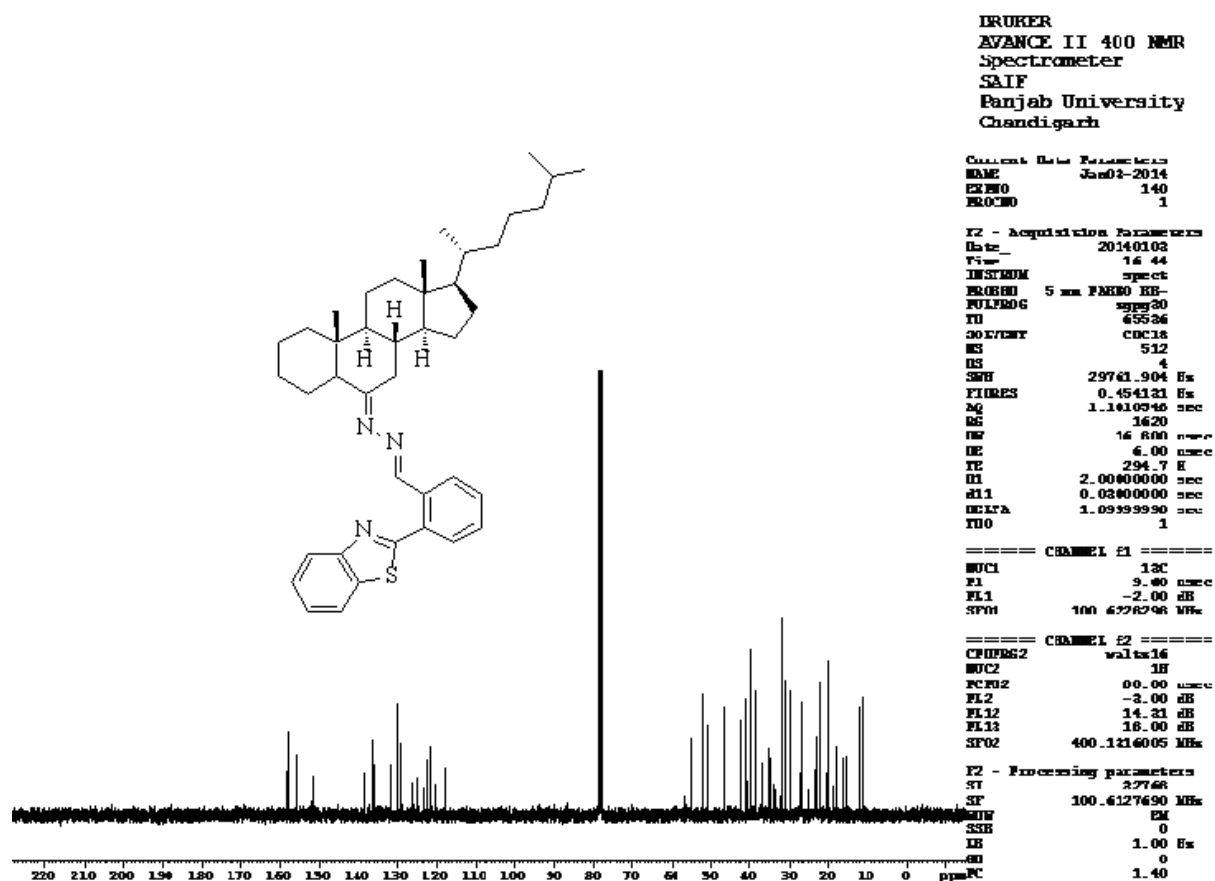

Fig S12.  $^{13}\text{C}$ NMR of 5 $\alpha$ -cholestan-6-(iminohydrazonomethylphenyl-2-yl)-benzo-[d]-thiazole (6)

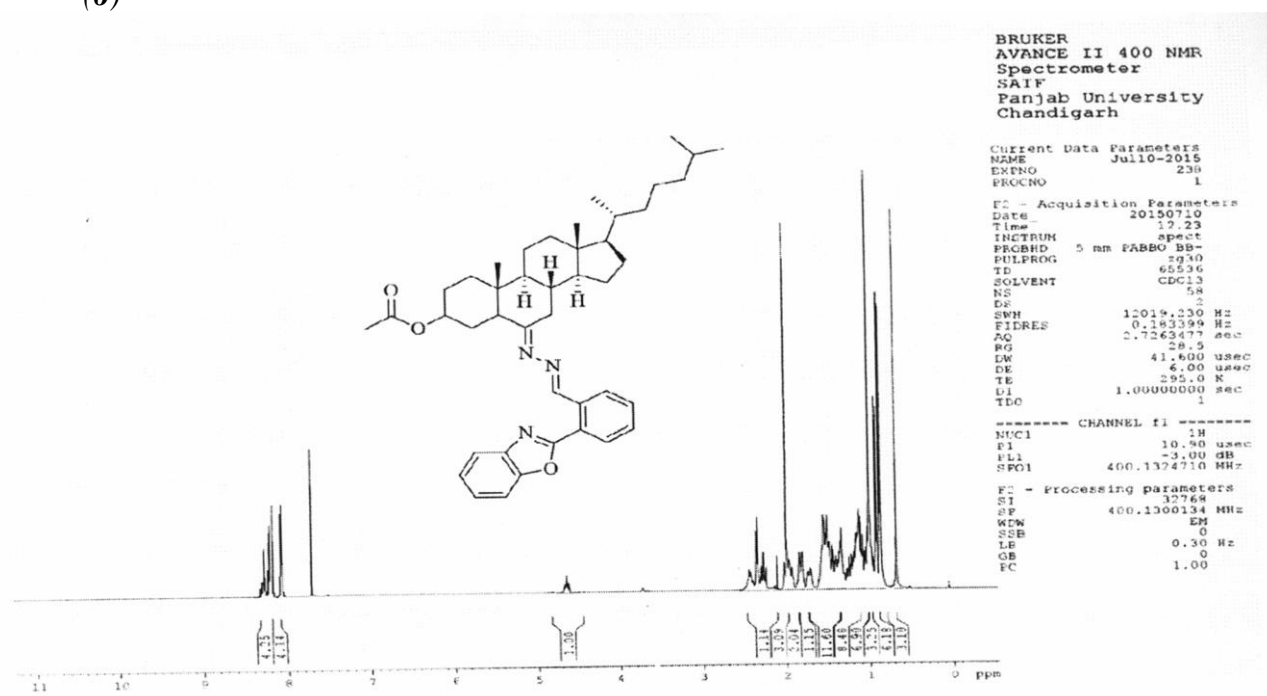

Fig S13.  $^1\text{H}$ NMR of 3 $\beta$ -Acetoxy-5 $\alpha$ -cholestan-6-(iminohydrazonomethylphenyl-2-yl)-benzo-[d]-oxazole (7)

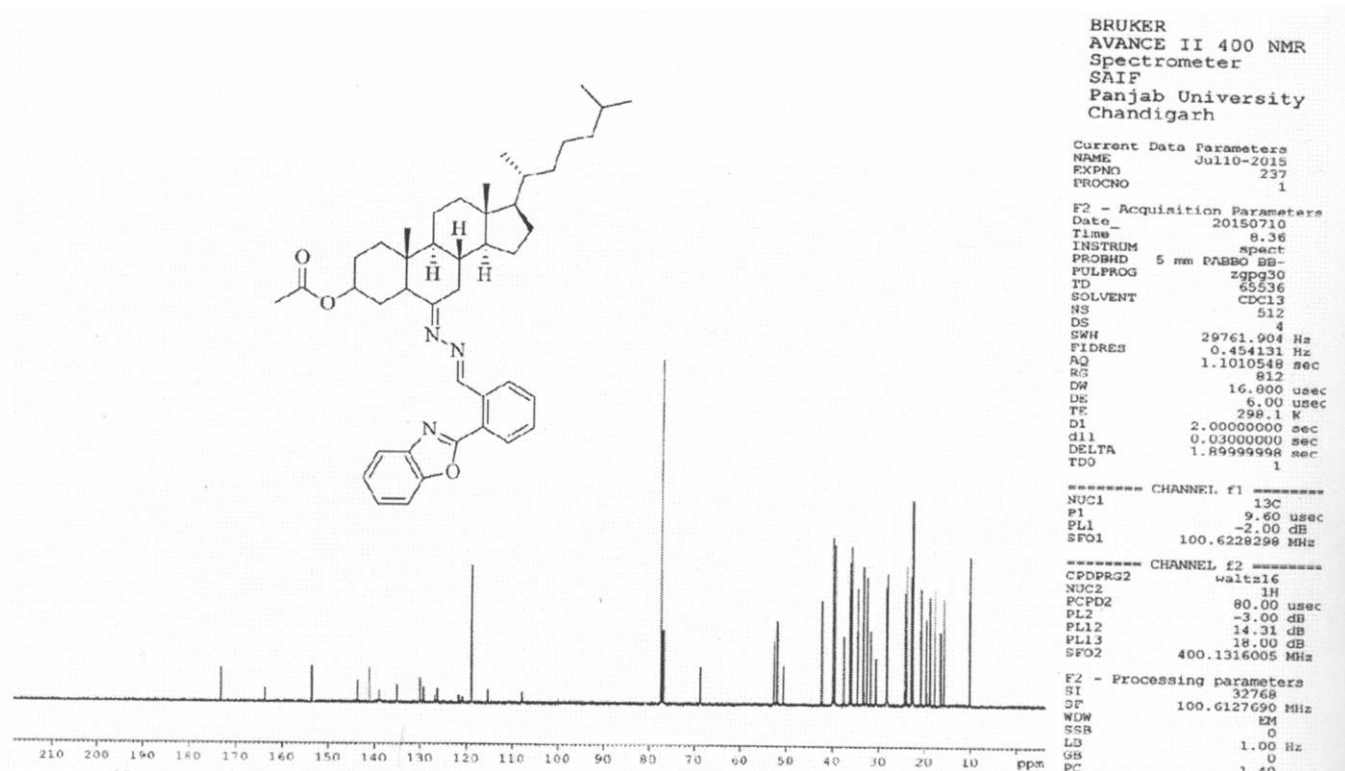

**Fig S14.**  $^{13}\text{C}$ NMR of 3 $\beta$ -Acetoxy-5 $\alpha$ -cholestan-6-(iminohydrazonomethylphenyl-2-yl)-benzo-*[d]*-oxazole (7)

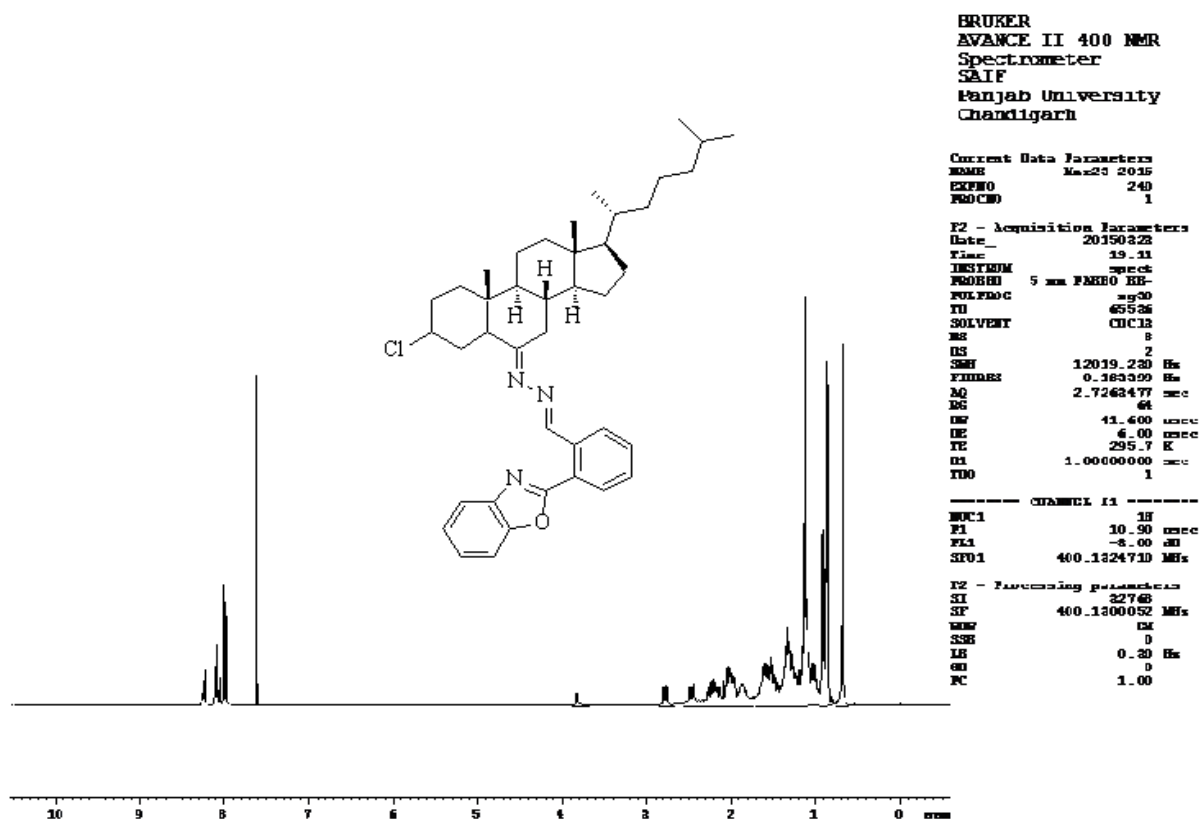

**Fig S15.**  $^1\text{H}$ NMR of 3 $\beta$ -Chloro-5 $\alpha$ -cholestan-6-(iminohydrazonomethylphenyl-2-yl)-benzo-*[d]*-oxazole (8)

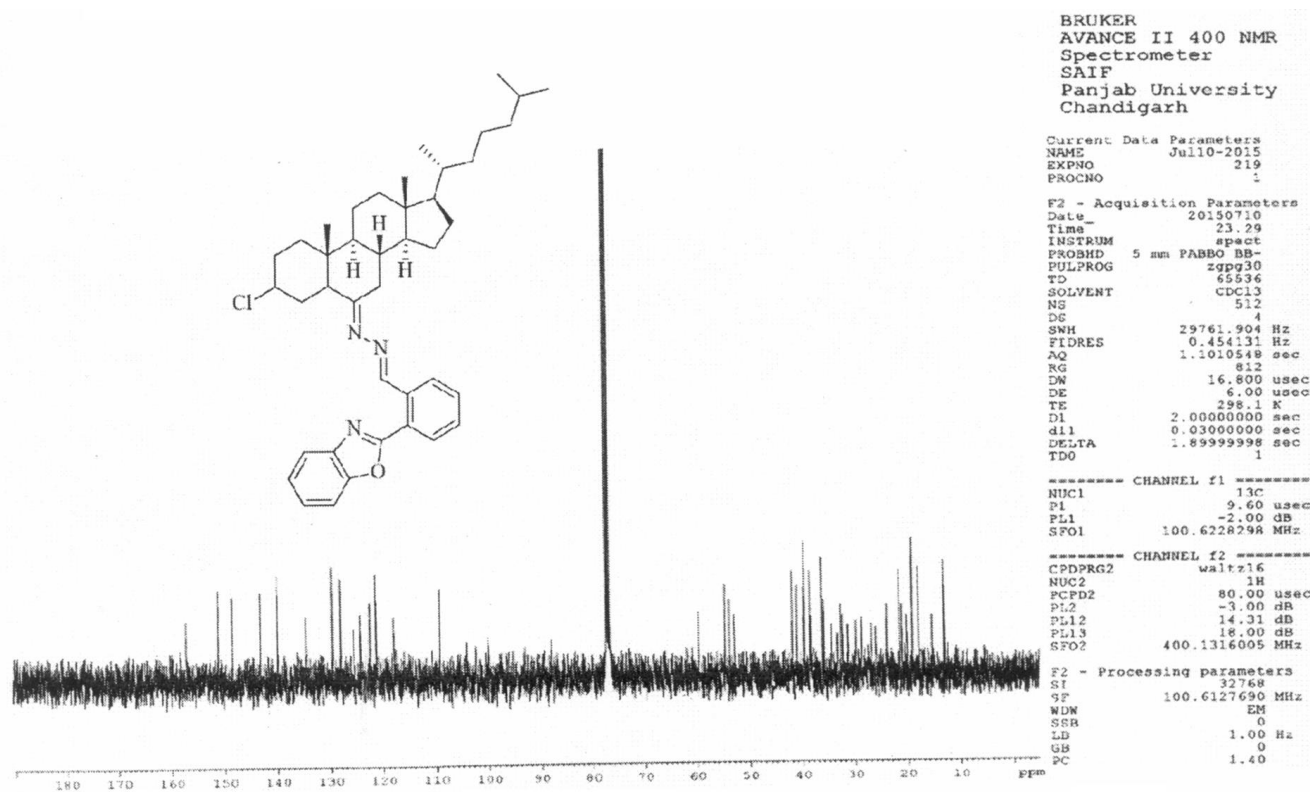

**Fig S16.**  $^{13}\text{C}$ NMR of 3 $\beta$ -Chloro-5 $\alpha$ -cholestan-6-(iminohydrazonomethylphenyl-2-yl)-benzo-[d]-oxazole (8)

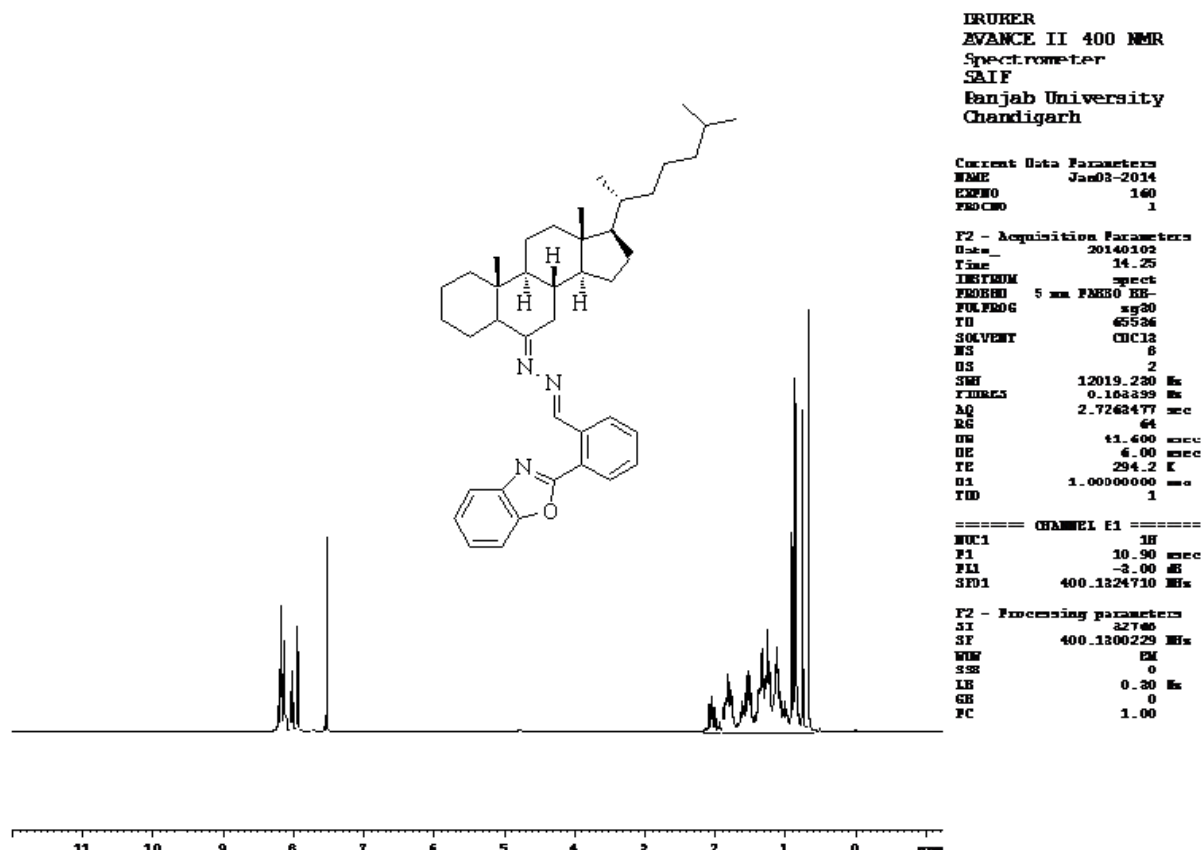

**Fig S17.**  $^1\text{H}$ NMR of 5 $\alpha$ -cholestan-6-(iminohydrazonomethylphenyl-2-yl)-benzo-[d]-oxazole (9)

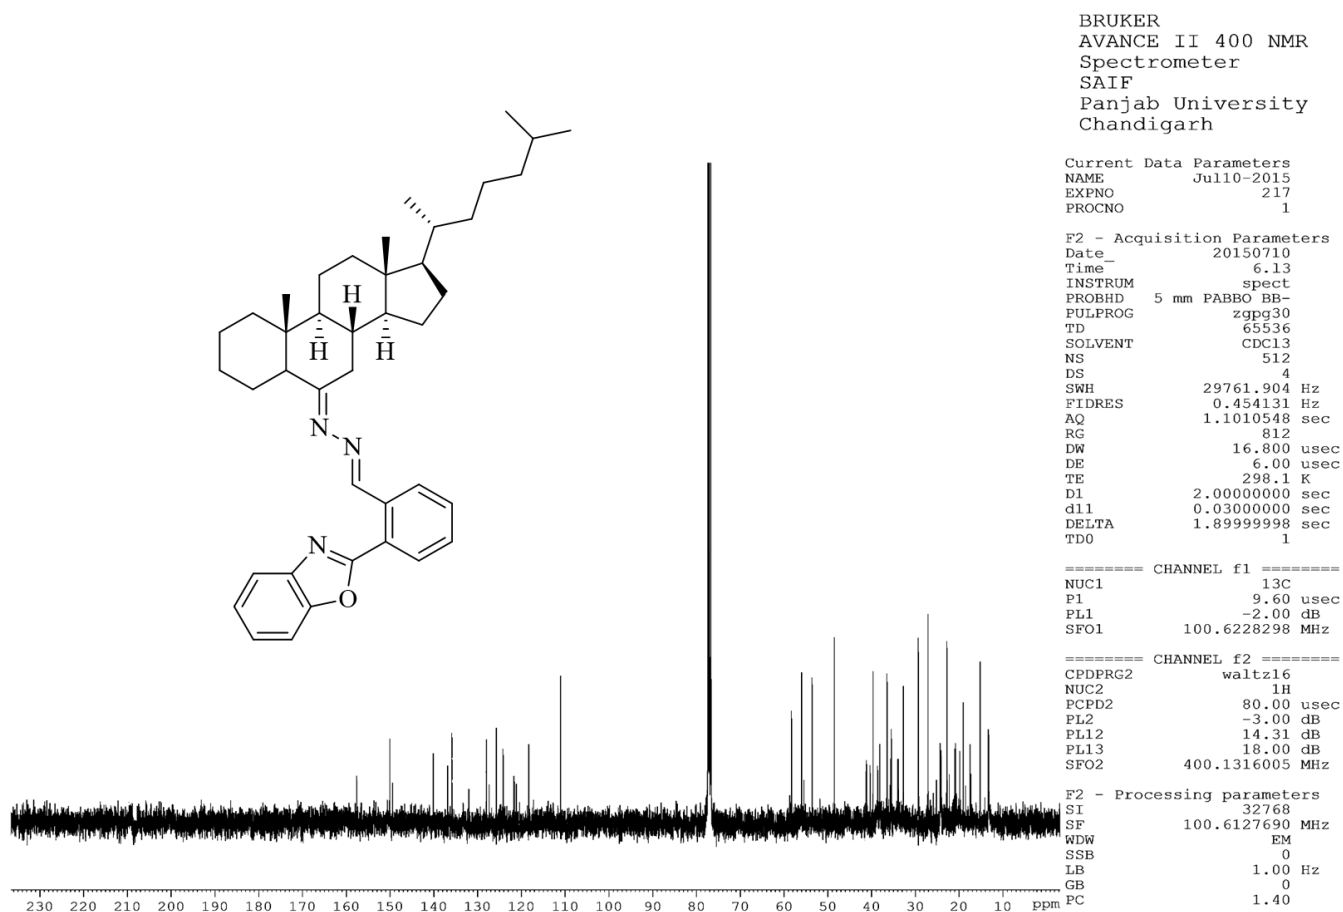

**Fig S18.**  $^{13}\text{C}$ NMR of 5 $\alpha$ -cholestan-6-(iminohydrazonomethylphenyl-2-yl)-benzo-[d]-oxazole (9)

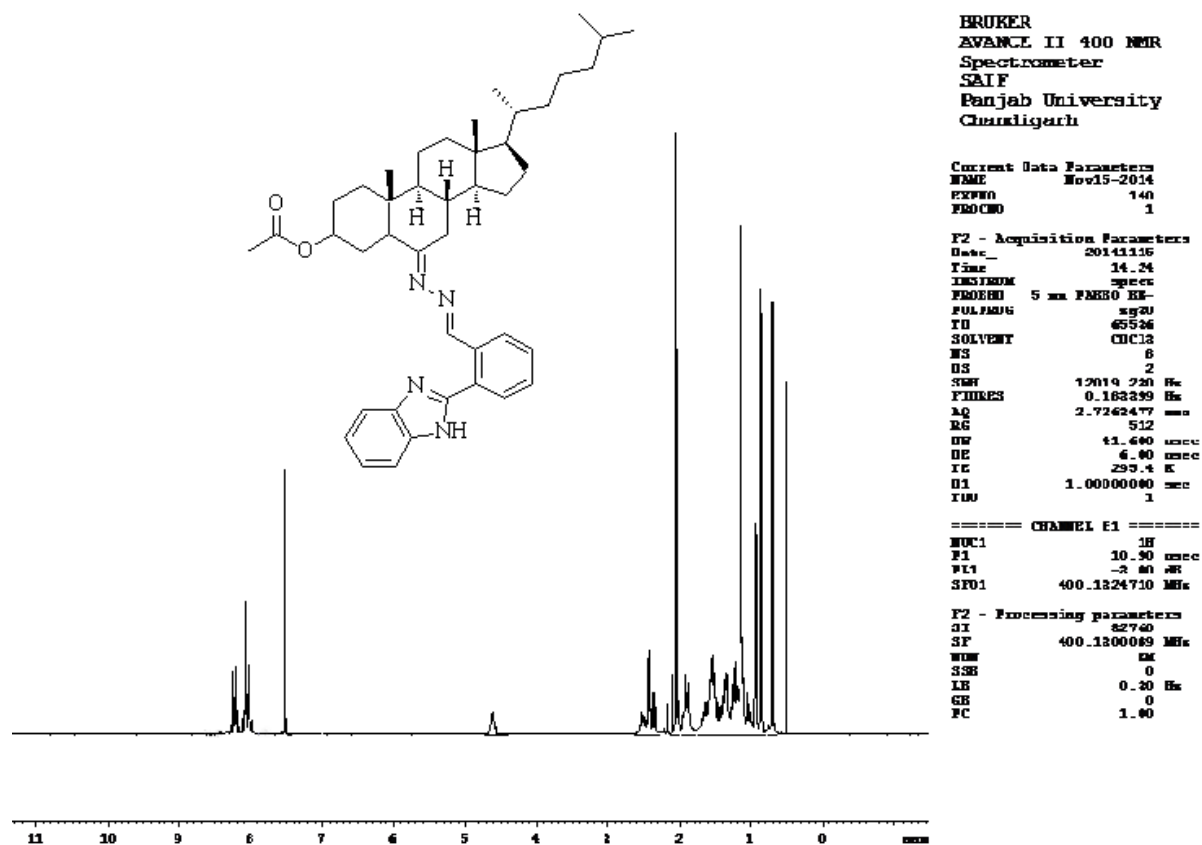

**Fig S19.**  $^1\text{H}$ NMR of  $3\beta$ -Acetoxy- $5\alpha$ -cholestan-6-(iminohydrazonomethylphenyl-2-yl)-benzo- $[d]$ -imidazole (**10**)



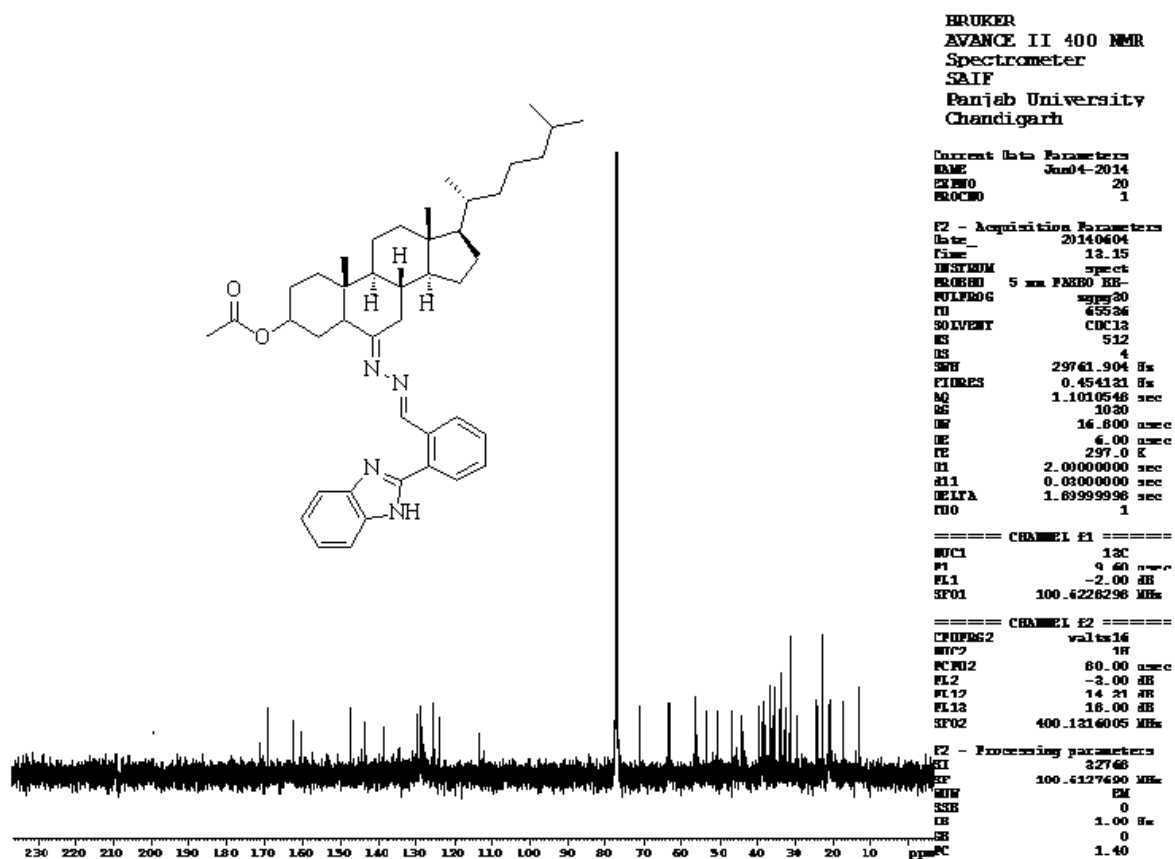

**Fig S20.**  $^{13}\text{C}$ NMR of 3 $\beta$ -Acetoxy-5 $\alpha$ -cholestan-6-(iminohydrazonomethylphenyl-2-yl)-benzo-*[d]*-imidazole (**10**)



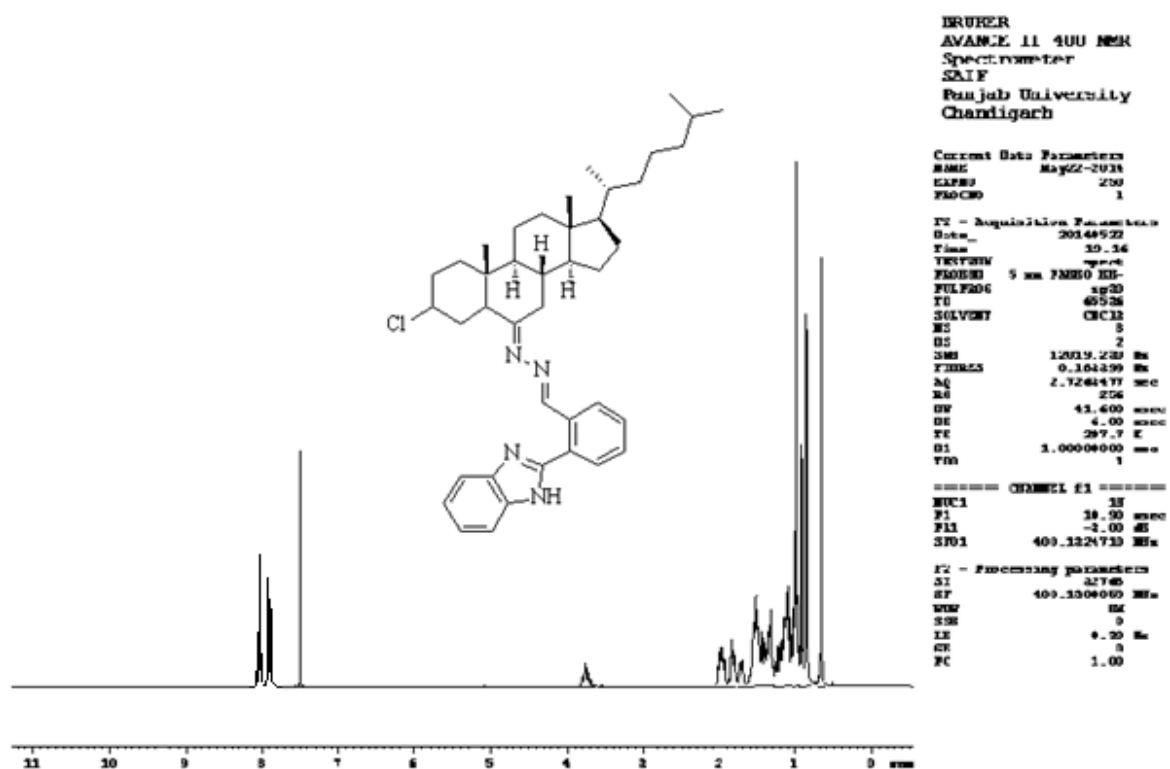

**Fig S21.**  $^1\text{H}$ NMR of  $3\beta$ -Chloro- $5\alpha$ -cholestan-6-(iminohydrazonomethylphenyl-2-yl)-benzo- $[d]$ -imidazole (**11**)

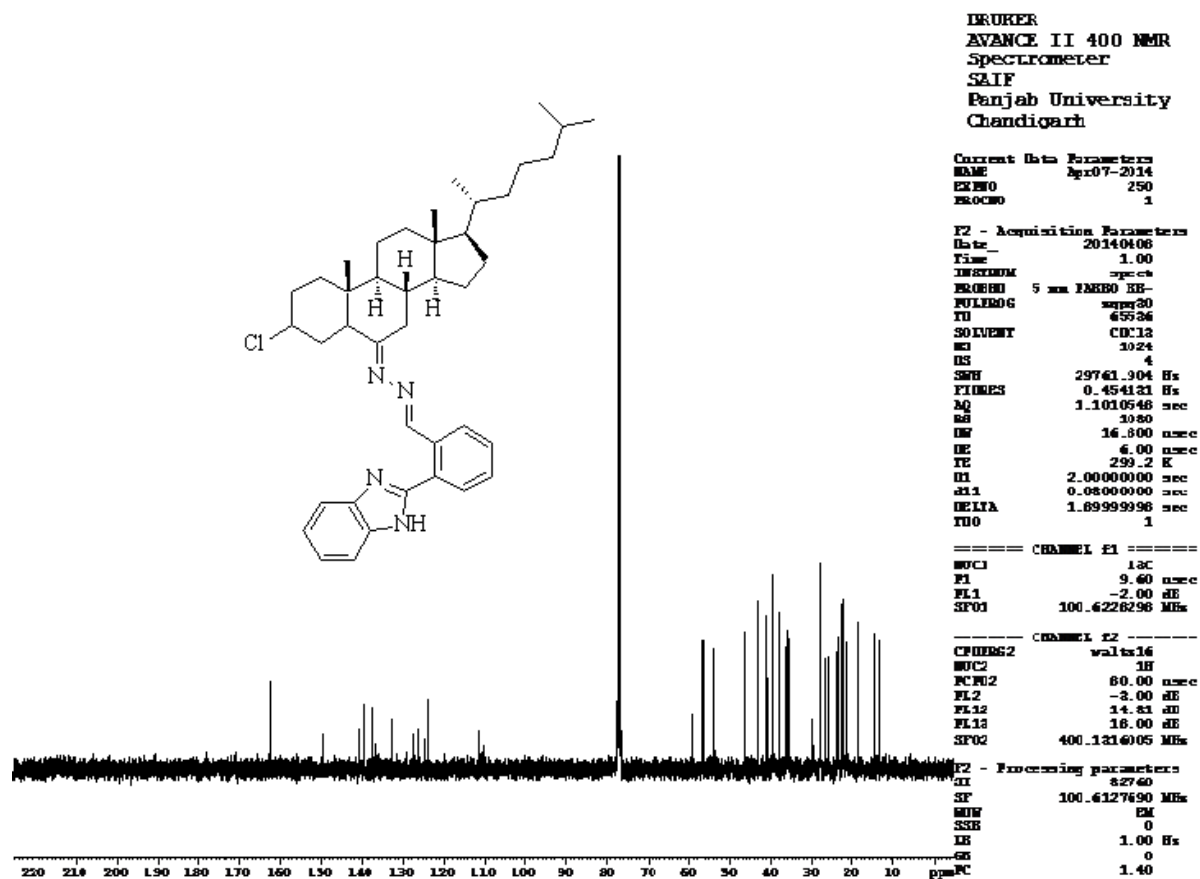

**Fig S22.**  $^{13}\text{C}$ NMR of 3 $\beta$ -Chloro-5 $\alpha$ -cholestan-6-(iminohydrazonomethylphenyl-2-yl)-benzo-*[d]*-imidazole (**11**)

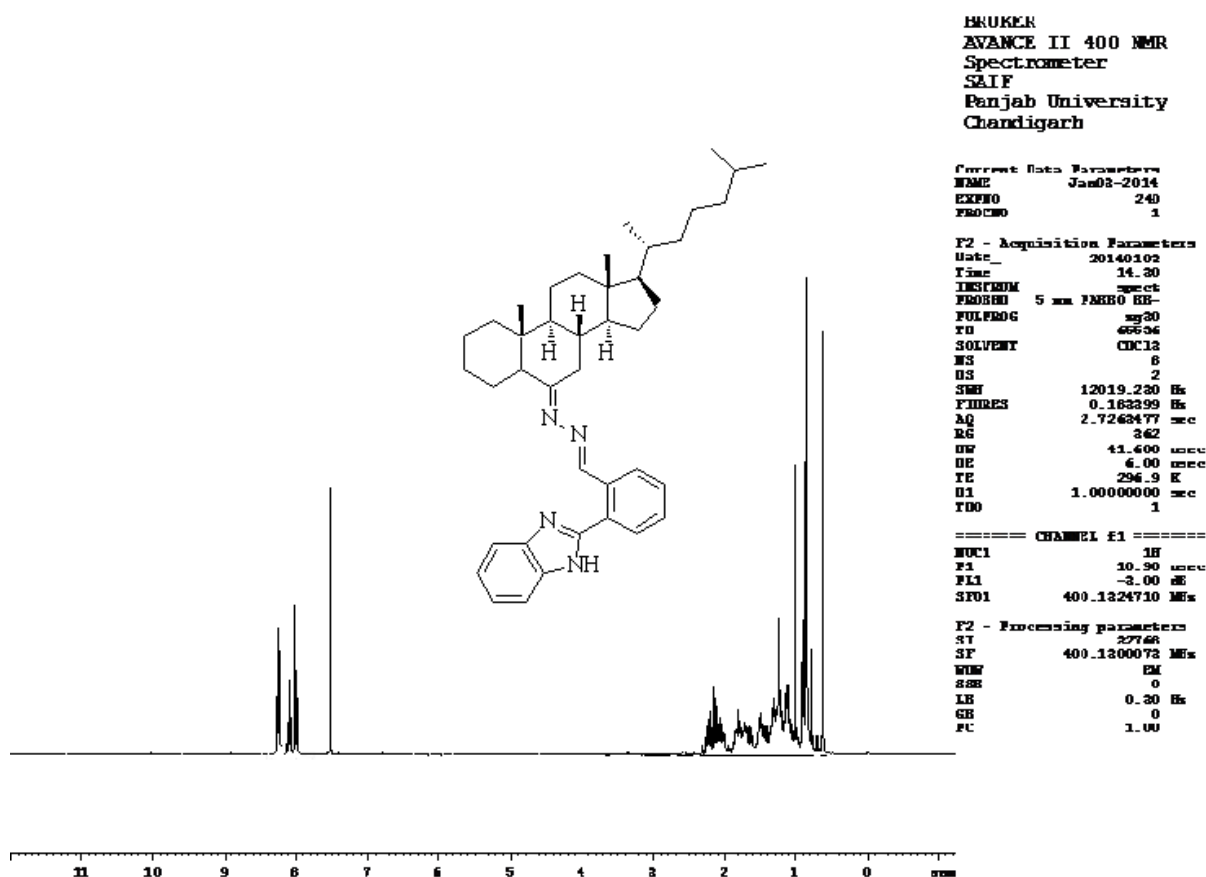

**Fig S23.**  $^1\text{H}$ NMR of 5 $\alpha$ -cholestan-6-(iminohydrazonomethylphenyl-2-yl)-benzo-[d]-imidazole (**12**)

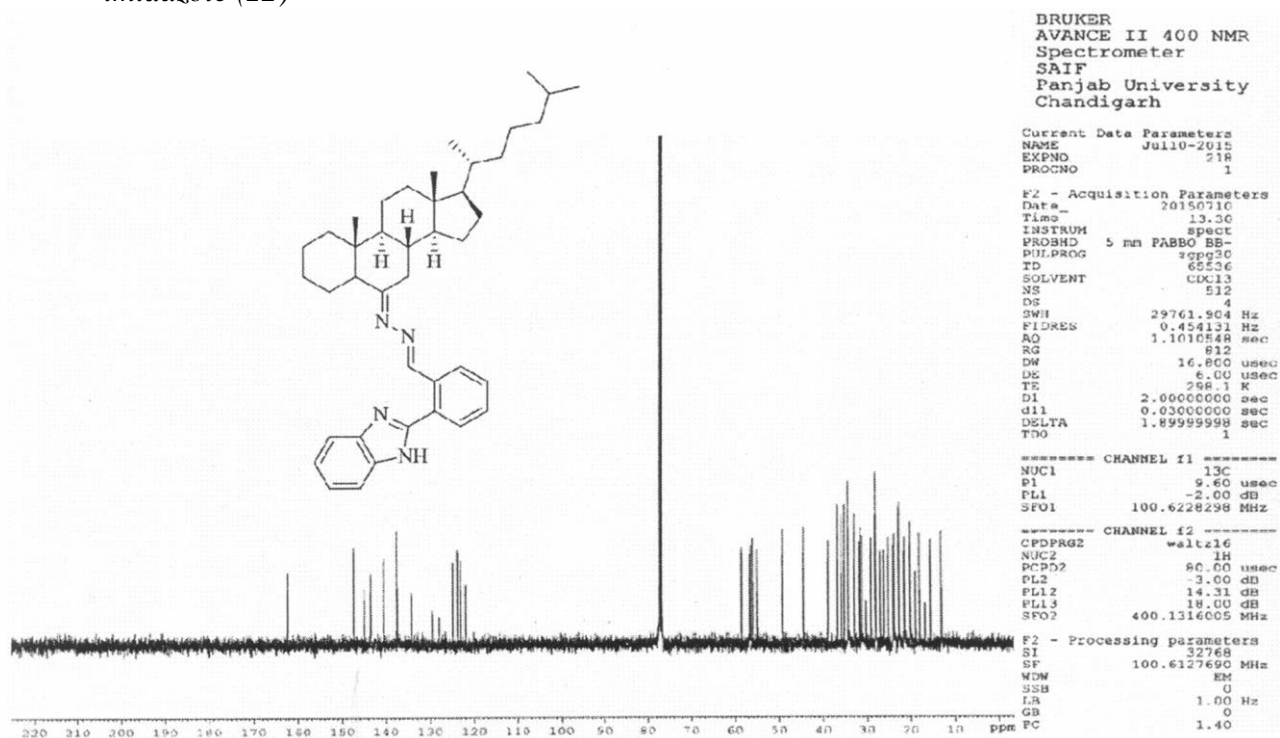

**Fig S24.**  $^{13}\text{C}$ NMR of 5 $\alpha$ -cholestan-6-(iminohydrazonomethylphenyl-2-yl)-benzo-[d]-imidazole (**12**)

## Figures of HRMS Spectra

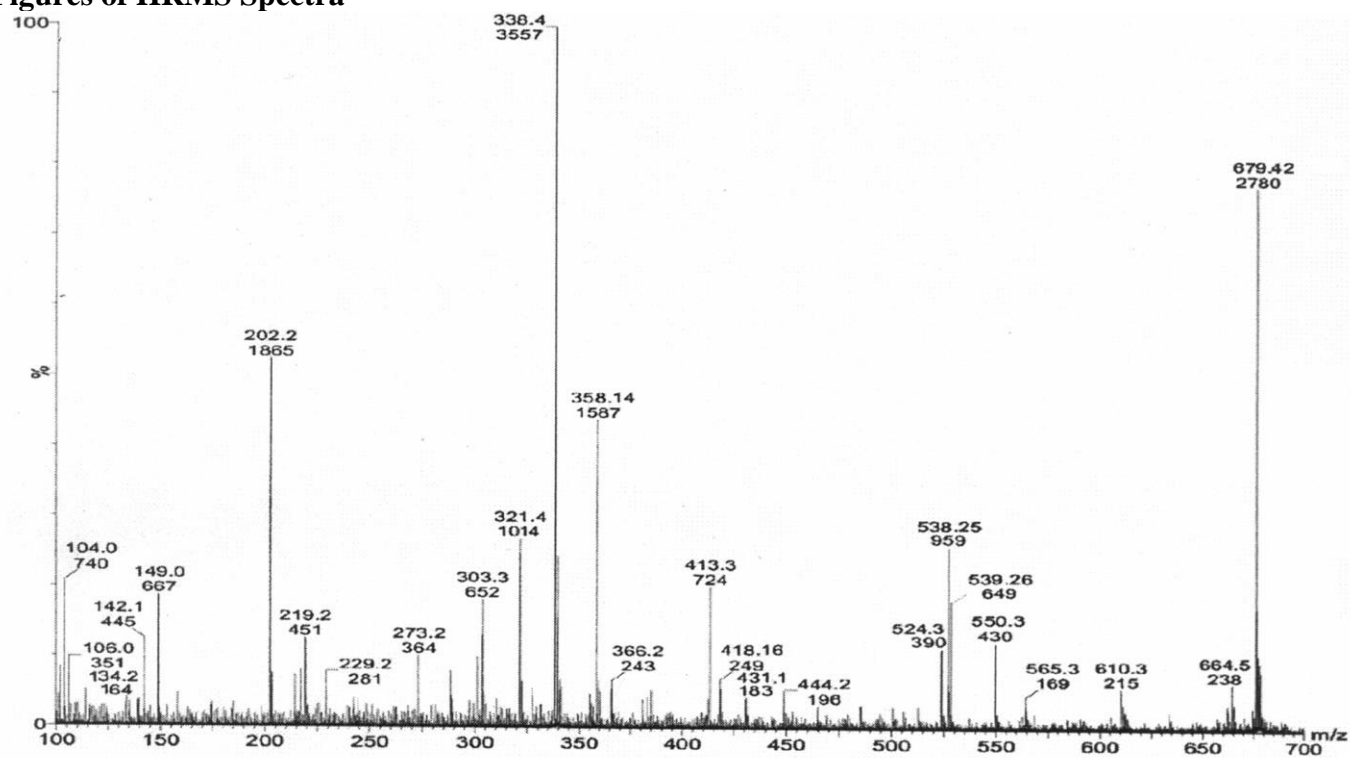

HRMS Spectra of compound 4

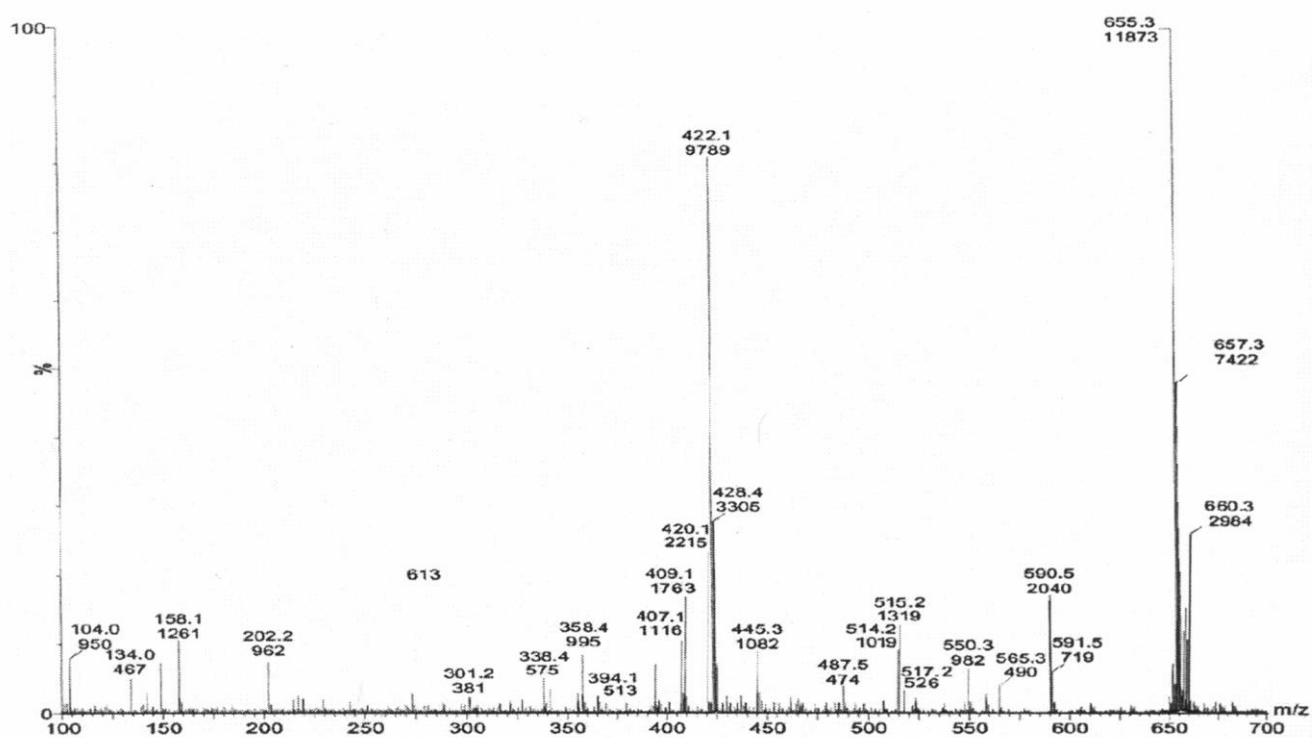

HRMS Spectra of compound 5

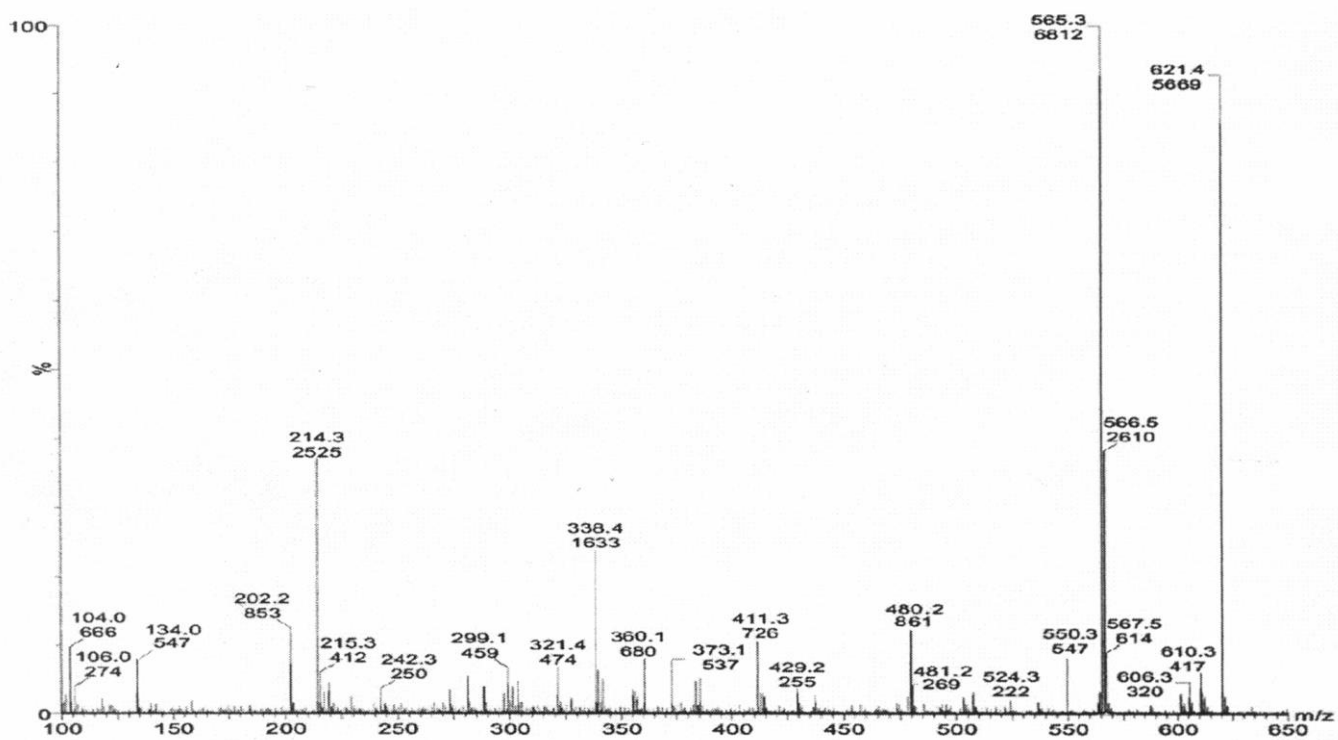

HRMS Spectra of compound 6

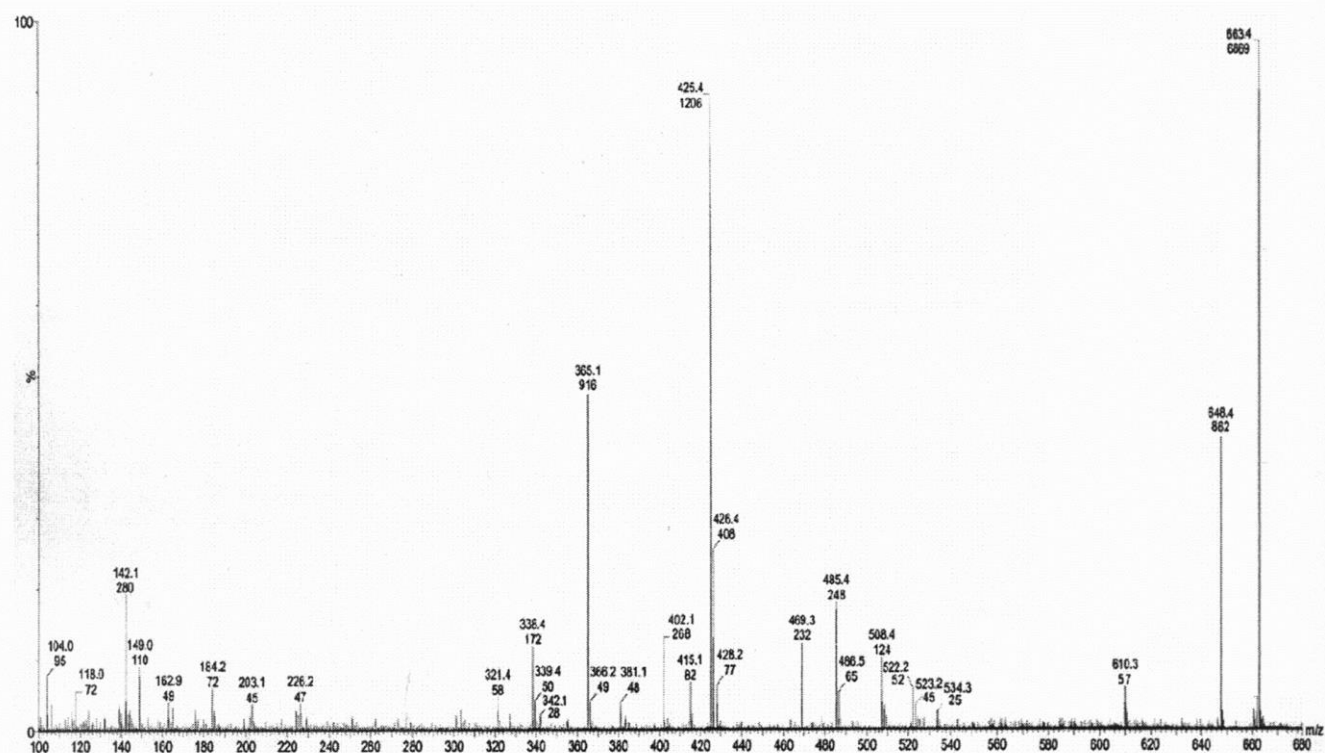

HRMS Spectra of compound 7

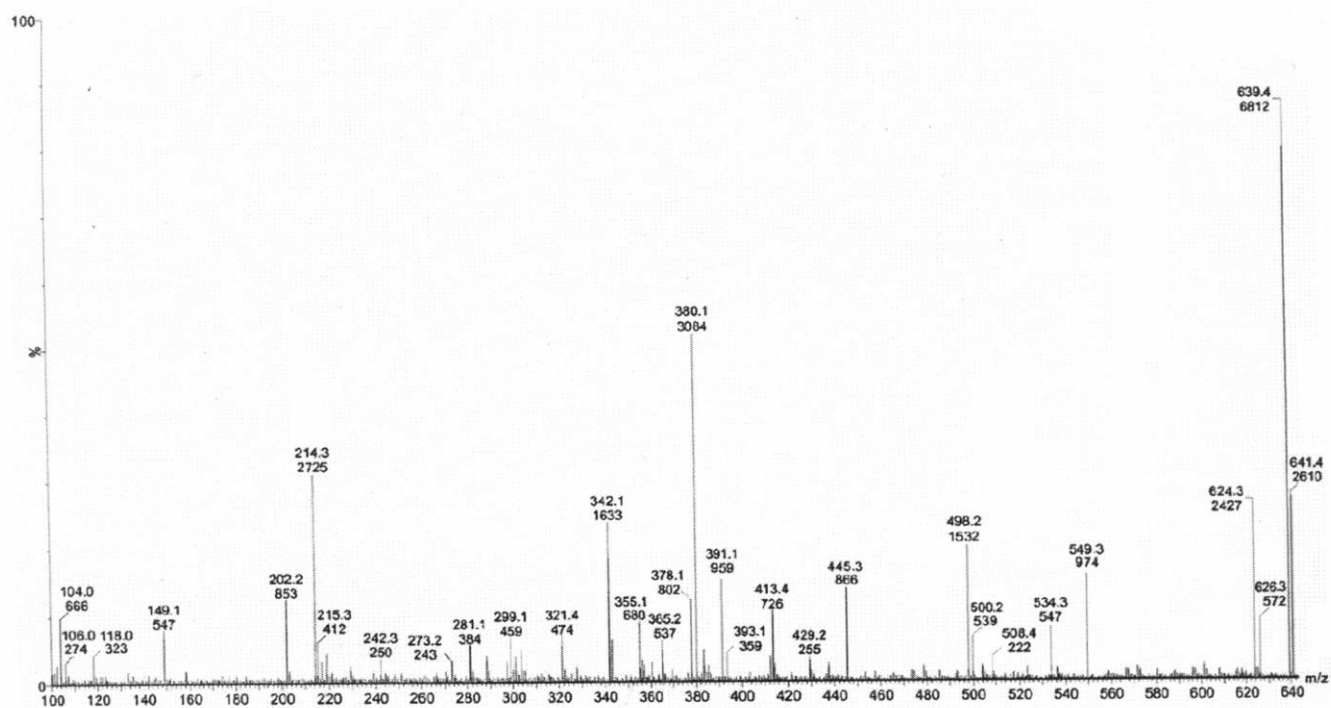

HRMS Spectra of compound 8

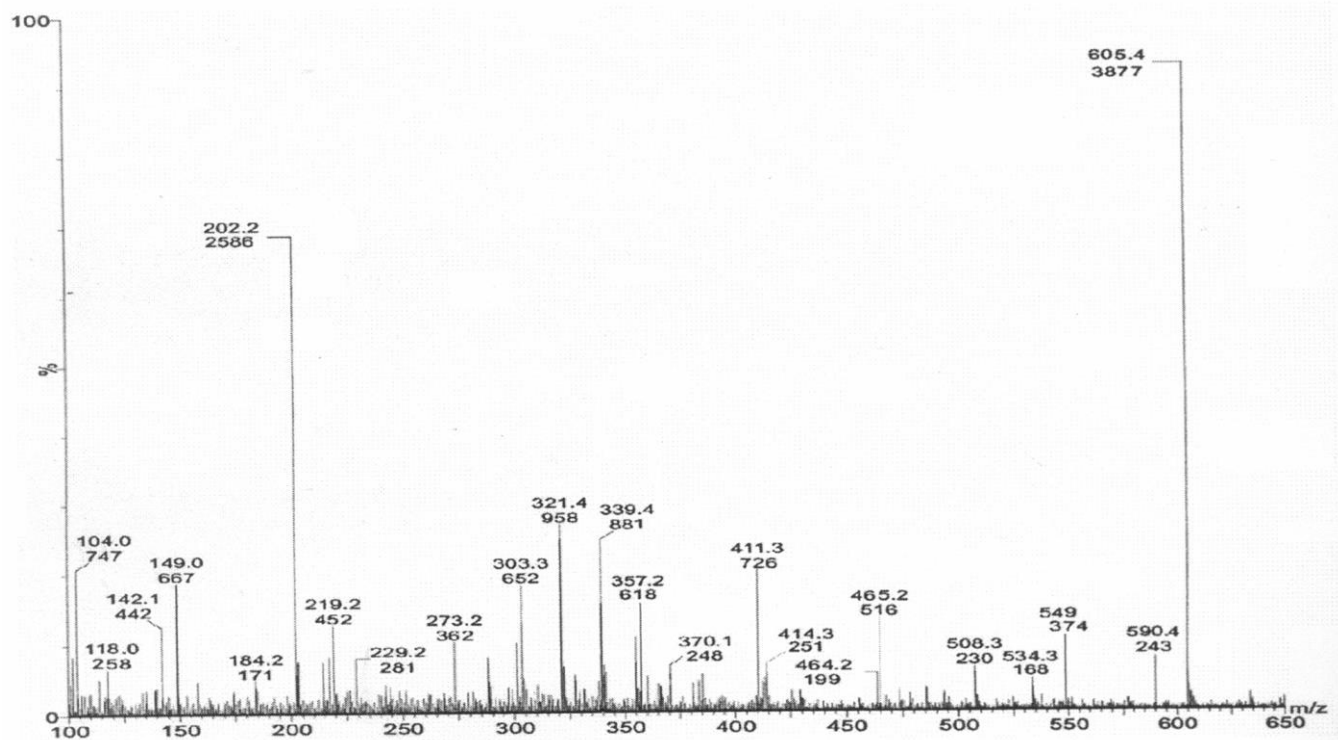

HRMS Spectra of compound 9

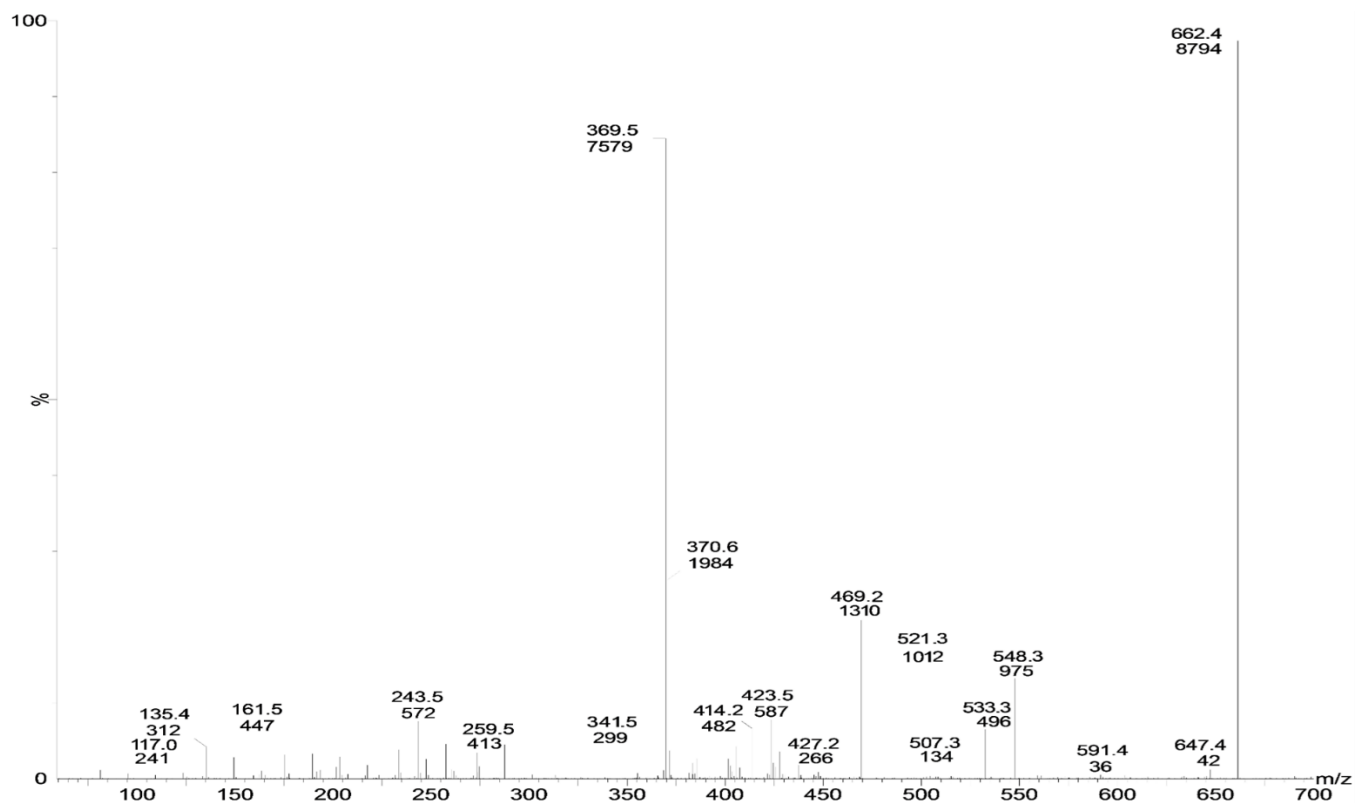

HRMS Spectra of compound 10

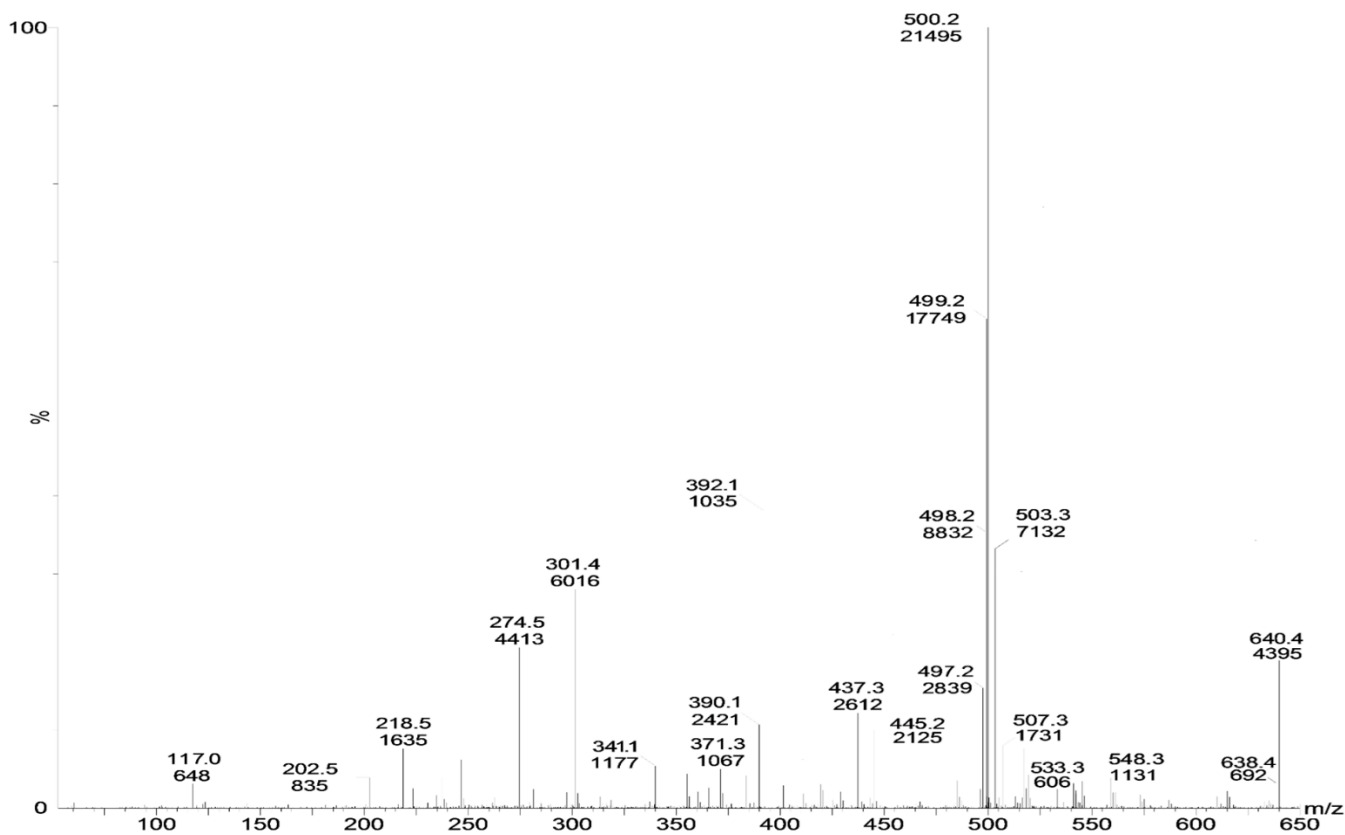

HRMS Spectra of compound 11

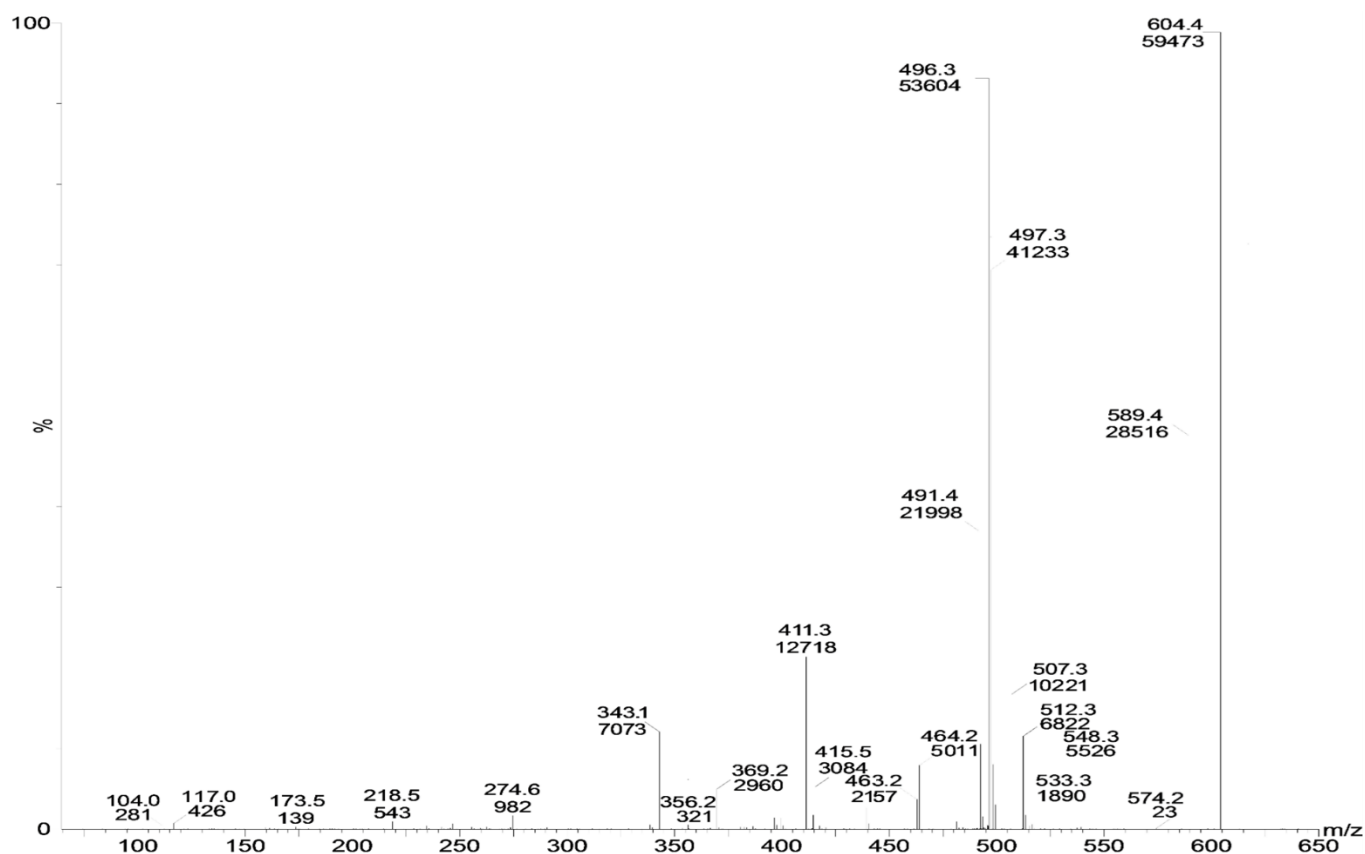

HRMS Spectra of compound **12**
